1 ***Linnemannia elongata* (Mortierellaceae) stimulates *Arabidopsis***  
2 ***thaliana* aerial growth and responses to auxin, ethylene, and reactive**  
3 **oxygen species**

4

5 Natalie Vandepol<sup>1</sup>, Julian Liber<sup>2,3</sup>, Alan Yocca<sup>2</sup>, Jason Matlock<sup>4</sup>, Patrick Edger<sup>5</sup>, Gregory Bonito<sup>1,6</sup>

6

7 <sup>1</sup>Michigan State University, Department of Microbiology & Molecular Genetics, East Lansing MI  
8 48825

9 <sup>2</sup>Michigan State University, Department of Plant Biology, East Lansing MI 48824

10 <sup>3</sup>Michigan Duke University, Department of Biology, Durham NC, 27708

11 <sup>4</sup>Michigan State University, Department of Entomology, East Lansing MI 48824

12 <sup>5</sup>Michigan State University, Department of Horticulture, East Lansing MI 48824

13 <sup>6</sup>Michigan State University, Department of Plant Soil and Microbial Sciences, East Lansing MI  
14 48824

15

16

## 17 **Abstract**

18 Harnessing the plant microbiome has the potential to improve agricultural yields and protect plants  
19 against pathogens and/or abiotic stresses, while also relieving economic and environmental costs  
20 of crop production. While previous studies have gained valuable insights into the underlying  
21 genetics facilitating plant-fungal interactions, these have largely been skewed towards certain  
22 fungal clades (e.g. arbuscular mycorrhizal fungi). Several different phyla of fungi have been  
23 shown to positively impact plant growth rates, including Mortierellaceae fungi. However, the extent  
24 of the plant growth promotion (PGP) phenotype(s), their underlying mechanism(s), and the impact  
25 of bacterial endosymbionts on fungal-plant interactions remain poorly understood for  
26 Mortierellaceae. In this study, we focused on the symbiosis between soil fungus *Linnemannia*  
27 *elongata* (Mortierellaceae) and *Arabidopsis thaliana* (Brassicaceae), as both organisms have  
28 high-quality reference genomes and transcriptomes available, and their lifestyles and growth  
29 requirements are conducive to research conditions. Further, *L. elongata* can host bacterial  
30 endosymbionts related to *Mollicutes* and *Burkholderia*. The role of these endobacteria on  
31 facilitating fungal-plant associations, including potentially further promoting plant growth, remains  
32 completely unexplored. We measured *Arabidopsis* aerial growth at early and late life stages, seed  
33 production, and used mRNA sequencing to characterize differentially expressed plant genes in  
34 response to fungal inoculation with and without bacterial endosymbionts. We found that *L.*  
35 *elongata* improved aerial plant growth, seed mass and altered the plant transcriptome, including  
36 the upregulation of genes involved in plant hormones and “response to oxidative stress”, “defense  
37 response to bacterium”, and “defense response to fungus”. Furthermore, the expression of genes  
38 in certain phytohormone biosynthetic pathways were found to be modified in plants treated with  
39 *L. elongata*. Notably, the presence of *Mollicutes*- or *Burkholderia*-related endosymbionts in  
40 *Linnemannia* did not impact the expression of genes in *Arabidopsis* or overall growth rates.

41

## 42 Introduction

43 Microbial promotion of plant growth has great potential to improve agricultural yields and protect  
44 plants against pathogens and/or abiotic stresses, while also relieving economic and  
45 environmental costs of crop production [1,2]. Agriculturally important metrics pertaining to plant  
46 growth promotion include aerial biomass, root biomass, root architecture, seed number, seed  
47 size, and flowering time. Early-diverging filamentous fungi in the Mucoromycota are one group of  
48 plant beneficial microbes, which have been hypothesized to have assisted plants in the  
49 colonization of land [3]. There are three main guilds of plant mutualistic fungi relevant to this study:  
50 arbuscular mycorrhizal (AM) fungi, ectomycorrhizal (EM) fungi, and non-mycorrhizal (NM)  
51 endophytic fungi. For the purpose of this study, NM root endophytes are defined as fungi that are  
52 found inside healthy plant roots but do not make characteristic mycorrhizal structures. Most of  
53 these fungi are thought to promote plant growth primarily by providing water and mineral nutrients,  
54 and sometimes secondarily by precluding infection by pathogens and/or priming and regulating  
55 plant defense responses [4]. However, the signaling mechanisms and fungal symbiotic structures  
56 are very distinct between and within these functional guilds, largely because most EM and NM  
57 associations represent convergent evolution on a phenotype, rather than a shared evolutionary  
58 mechanism of interaction [5].

59 Mortierellaceae are soil fungi in the subphylum Mortierellomycotina [6]. They are closely related  
60 to Glomeromycotina (AMF) and Mucoromycotina, some of which are EM fungi [3,7,8]. Plant  
61 associations with Mortierellaceae have been recorded since the early 1900s and these fungi are  
62 broadly considered NM plant associates [9–11]. Many studies have investigated the impacts of  
63 Mortierellaceae fungi on plant growth, however, the extent of the plant growth promotion (PGP)  
64 phenotype(s) and the mechanism(s) underlying their association are still not well understood [12–  
65 15].

66 Recent inoculation studies of Mortierellaceae on plant roots show that these fungi elicit a strong  
67 PGP phenotype on a broad range of plant hosts [1,12,15]. Maize plants inoculated with  
68 *Linnemannia elongata* (= *Mortierella elongata*) had increased plant height and dry aerial biomass  
69 and analysis of phytohormone levels indicated high levels of abscisic acid and the auxin IAA  
70 (indole-3-acetic acid) in response to *L. elongata* [1]. In contrast, *Arabidopsis thaliana* Col-0  
71 (hereafter *Arabidopsis*) inoculated with *L. hyalina* (= *Mortierella hyalina*) also showed increased  
72 total leaf surface area and aerial dry biomass, with reduced levels of abscisic acid and no  
73 stimulation of auxin-responsive genes [12]. *Mortierella antarctica* was shown to increase the  
74 growth of winter wheat by producing phytohormones IAA and gibberellic acid (GA) and the

75 enzyme ACC (1-aminocyclopropane-1-carboxylate) deaminase, which degrades ACC, a  
76 precursor to the phytohormone ethylene [15].

77 Recent studies have demonstrated Mortierellaceae can harbor endobacterial symbionts [16–19].  
78 However, the impacts of endohyphal bacteria on the PGP phenotype have not been assessed.  
79 Although the incidence of endobacteria within isolates of Mortierellaceae is quite low (<10%), a  
80 diversity of bacteria including *Mycoavidus cysteinexigens* and *Mycoplasma*-related endobacteria  
81 (MRE) are known to colonize mycelium of diverse species across most of the genera in the family  
82 [16–18,20]. Many species including *L. elongata* can harbor either *Mycoavidus cysteinexigens* or  
83 MRE, however, there is generally a single lineage of endobacteria within any particular isolate  
84 [16]. Both MRE and *Ca. Glomeribacter*, a *Burkholderia*-related endobacteria (BRE) that is  
85 phylogenetically the sister group to *Mycoavidus*, are found in the Glomeromycotina. *Ca.*  
86 *Glomeribacter* has been shown to increase fungal-host biological potential, and is hypothesized  
87 to impact plant interactions as a mutualistic partner [21,22].

88 In this study, we have focused on interaction between *L. elongata* and *Arabidopsis*, as both  
89 organisms have reference genomes and transcriptomes available. Further, *Arabidopsis* is small,  
90 has a short lifespan, and is ideal for follow-up studies relying on genetic manipulation. We used  
91 two isolates of *L. elongata*, NVP64 and NVP80, to better understand mechanisms underlying *L.*  
92 *elongata* symbiosis with plants. These two isolates of *L. elongata* were isolated from the same  
93 soil, but were found to be colonized by different endobacteria; NVP64 contains *Mycoavidus*  
94 *cysteinexigens* (BRE) while NVP80 contains MRE, designated as NVP64wt and NVP80wt given  
95 that they are the wild-types of these strains. To determine whether either endobacterium has an  
96 impact on the plant-fungal symbiosis we generated “cured” isogenic lines of each isolate,  
97 NVP64cu and NVP80cu, where the endobacteria were removed through antibiotic passaging. We  
98 hypothesized that *L. elongata* would provide a PGP phenotype and that endobacteria would  
99 impact this response. We measured PGP of aerial growth at early and late life stages, seed  
100 production, and used RNA sequencing to characterize differentially expressed plant genes in  
101 response to fungal and endobacteria treatments.

102

## 103 **Materials & Methods**

### 104 **Plant and fungal culturing**

#### 105 Growth media

106 Fungal strains were cultured in malt extract broth [MEB: 10 g/L Malt Extract (VWR), 1 g/L Bacto  
107 Yeast Extract (Difco, Thomas Scientific; New Jersey, USA)], malt extract agar [MEA: 10 g/L Malt  
108 Extract, 1 g/L Bacto Yeast Extract, 10 g/L Bacto Agar (Difco)], and Kaefer Medium [KM: 20 g/L  
109 D-Glucose, 2 g/L Peptone, 1 g/L Yeast Extract, 1 g/L Bacto Casamino Acids (Difco), 2 mL/L Fe-  
110 EDTA [2.5 g FeSO<sub>4</sub>\*7H<sub>2</sub>O, 3.36 g Na<sub>2</sub>EDTA, 500 mL water], 50 mL/L KM Macronutrients [12 g/L  
111 NaNO<sub>3</sub>, 10.4 g/L KCl, 10.4 g/L MgSO<sub>4</sub>\*7H<sub>2</sub>O, 30.4 g/L KH<sub>2</sub>PO<sub>4</sub>], 10 mL/L KM Micronutrients [2.2  
112 g/L ZnSO<sub>4</sub>\*7H<sub>2</sub>O, 2.2 g/L H<sub>3</sub>BO<sub>3</sub>, 0.16 g/L CuSO<sub>4</sub>\*5H<sub>2</sub>O, 0.5 g/L MnSO<sub>4</sub>\*H<sub>2</sub>O, 0.16 g/L  
113 CoCl<sub>2</sub>\*5H<sub>2</sub>O, 0.11 g/L (NH<sub>4</sub>)<sub>6</sub>Mo<sub>7</sub>O<sub>24</sub>\*4H<sub>2</sub>O], pH 6.5 with 10 N KOH, and supplemented with  
114 Thiamine (1 mg/L) and Biotin (0.5 mg/L) after autoclaving and cooling to 60°C]. Sterilized seeds  
115 were germinated on Murashige & Skoog (MS) medium [1xMS: 4.4 g/L Murashige and Skoog  
116 medium (Sigma Aldrich; Missouri, USA), pH 5.7 w/ KOH, and 10 g/L agar (Sigma, product#  
117 A1296)]. Plant-fungal experiments were conducted on Plant Nutrient Medium [PNM: 0.5 g/L  
118 KNO<sub>3</sub>, 0.49 g/L MgSO<sub>4</sub>\*7H<sub>2</sub>O, 0.47 g/L Ca(NO<sub>3</sub>)<sub>2</sub>\*4H<sub>2</sub>O, 2.5 mL/L Fe-EDTA, 1 mL/L PNM  
119 Micronutrients [4.3 g/L Boric Acid, 2.8 g/L MnCl<sub>2</sub>\*4H<sub>2</sub>O, 124.8 mg/L CuSO<sub>4</sub>\*5H<sub>2</sub>O, 287.5 mg/L  
120 ZnSO<sub>4</sub>\*7H<sub>2</sub>O, 48.4 mg/L Na<sub>2</sub>MoO<sub>4</sub>\*2H<sub>2</sub>O, 2.4 mg/L CoCl<sub>2</sub>\*6H<sub>2</sub>O], 10 g/L agar (Sigma, product#  
121 A1296), autoclaved and the pH adjusted with 2.5 mL/L 1M H<sub>2</sub>KPO<sub>4</sub> before pouring 22-24mL per  
122 100 mm square plate (with grid)].

123 To generate a fungal substrate suitable for inoculating potting mix, white millet (Natures Window;  
124 Michigan, USA), horticultural perlite (PVP Industries, Inc; Ohio, USA), and pearled barley  
125 (International Foodsource; New Jersey, USA) were each soaked overnight in DI water. The millet  
126 and barley were each boiled in fresh DI water on a hotplate until the grains began to break open,  
127 then removed from the hotplate and drained of excess water. When prepared, millet and barley  
128 expand to about 150% and 300% of the dry volume, respectively. The boiled millet, boiled barley,  
129 and perlite were mixed in a 2:1:1 v:v:v ratio. For each treatment, 600 mL of this “millet mix” was  
130 placed into a gusseted Unicorn bag (Unicorn Bags, type 10T; Texas, USA) and autoclaved for 45  
131 minutes, allowed to rest overnight under a sterile hood and autoclaved again for 45 minutes.

132 To generate sterile SureMix-based plant growth substrates, SureMix Perlite (Michigan Growers  
133 Products; Michigan, USA) substrate was saturated with deionized water, which was measured  
134 and placed into autoclavable bags to ensure the correct volume would be available. A single bag

135 was used for each experimental treatment. The bags of SureMix substrate were autoclaved 45  
136 minutes on a liquid cycle, stored at room temperature for 3-7 days, autoclaved again for 45  
137 minutes on a liquid cycle, cooled to room temperature, and rinsed through with 3 L of sterile MilliQ  
138 water (18 M $\Omega$ ·cm). The autoclaved SureMix was rinsed to remove autoclaving byproducts by  
139 flushing with 3 L of sterile MilliQ water on a dish cart covered with a double layer of window screen  
140 mesh which had been sterilized with bleach and rinsed with autoclaved MilliQ water.

#### 141 Curing fungi of endobacteria

142 Replicated lines of *L. elongata* NVP64wt and NVP80wt were cured of their endobacteria by  
143 repeated culturing in media containing antibiotics, a protocol adapted from Uehling et al. (2017).  
144 Fungi were transferred between MEB and MEA supplemented with 1 g/L Bacto Peptone (Difco),  
145 100  $\mu$ g/mL ciprofloxacin, 50  $\mu$ g/mL kanamycin, 50  $\mu$ g/mL streptomycin, and 50  $\mu$ g/mL  
146 chloramphenicol. Each transfer was performed by transplanting a 1-4 mm<sup>2</sup> piece of tissue from  
147 the outer edge or surface of the mycelium with a Nichrome inoculating loop and submerging the  
148 tissue under the agar surface or broth to maximize contact of the growing hyphae with the  
149 antibiotics. Transfers were performed every 3 or 4 days, alternating agar and broth substrate, for  
150 6 transfers.

151 Following antibiotic curing, tissue from the original and newly-cured lines, as well as the wild-type  
152 line, were cultured on antibiotic-free 60 mm MEA plates with an autoclaved cellophane sheet  
153 placed atop the agar. After 13 days of incubation, fungal tissue was scraped off the cellophane  
154 and DNA extracted using a CTAB-based chloroform extraction protocol (Supplementary Materials  
155 and Methods [23]).

#### 156 Arabidopsis seed sterilization & germination

157 *Arabidopsis thaliana* Col-0 CS70000 were obtained from the Arabidopsis Biological Resource  
158 Center. Seeds were germinated and grown for three generations in a grow room. Bulk seed was  
159 collected from the third generation and screened to homogenize seed size with 350  $\mu$ m and 250  
160  $\mu$ m sieves (VWR, Pennsylvania, USA), retaining the middle fraction.

161 Arabidopsis seeds were divided from the screened stock into 1.5 mL Eppendorf tubes using a  
162 200 seed spoon, with up to 1200 seeds per tube. Seeds were surface sterilized by washing in  
163 800  $\mu$ L 70% Ethanol for 20 seconds, discarding the ethanol, and then washing in 400  $\mu$ L 20%  
164 bleach (Clorox Performance, 8.3% Sodium Hypochlorite, Clorox, California, USA) for 30 seconds.  
165 Seeds were then rinsed of bleach three times by quenching with 1 mL sterile water and discarding  
166 the liquid. Seeds were then resuspended in 500  $\mu$ L sterile water prior to planting.

167 Surface sterilized seeds were plated on 1xMS using a p1000 and sterile water, 16 seeds per plate  
168 in rows of 3, 4, 5, and 4, with about 1cm between seeds and rows (**Supplementary Fig. S1a**).  
169 We germinated at least 5 times as many seeds as were needed for the experiment to allow greater  
170 control of seedling size.

171 Germination 1xMS plates were cold stratified for 2 days in the dark at 4°C to synchronize  
172 germination, then allowed to germinate and grow for 5 or 10 days, depending on the experiment,  
173 in a Percival I-36LLVL growth chamber at 103-118  $\mu\text{mol}/\text{m}^2\cdot\text{s}$  PAR with 16 hr day & 8 hr night,  
174 22°C, ambient humidity. Light levels were measured using an LI-250A light meter (LI-COR,  
175 Nebraska, USA).

## 176 **Potting mix experiments**

### 177 Grain-based inoculum

178 Each fungal strain was grown in 250 mL Erlenmeyer flasks with 75 mL of MEB for 2 weeks.  
179 Colonized medium was poured out into an autoclaved beaker and the mycelium collected with  
180 sterile tweezers, coarsely chopped in a sterile petri dish, and added to sterile millet mix bags. The  
181 bags were lightly mixed, sealed in two places with an impulse sealer, and the fungi allowed to  
182 colonize the spawn for two weeks.

### 183 Arabidopsis growth conditions

184 Five days after germination, Arabidopsis seedlings were transplanted from 1xMS plates to plug  
185 trays of autoclaved and rinsed SureMix and moved to a Bio Chambers AC-40 growth chamber  
186 with 16 hr day, 8 hr night, 22°C, ambient humidity. Seedlings were grown in plugs for 11 days (16  
187 days after germination). The soil plugs and seedling roots were treated with Zeritol 2.0 (BioSafe  
188 Systems, Connecticut, USA), an algaecide, bactericide, and fungicide containing Hydrogen  
189 Peroxide & Peroxyacetic Acid. The Zeritol was applied as a soil drench for 15 minutes, rinsed  
190 three times with distilled water, and transplanted into 4 in<sup>3</sup> pots with SureMix mixed with the  
191 appropriate millet mix treatment. Each treatment was contained in a separate waterproof tray with  
192 an 18 pot capacity (3 rows of 6 pots). Using seventeen pots per treatment left an empty spot for  
193 watering. Four days after transplanting, seedlings were treated with 2 L of Peters 20-20-20  
194 fertilizer mixed at 1/8th strength (0.1 tsp/L) in MilliQ water. Thereafter, plants were watered with  
195 MilliQ water as needed.

196 *Above ground biomass*

197 At 34 days after transplanting and inoculation (50 days after germination), all treatments were  
198 observed to have ripening siliques, necessitating harvesting to avoid excessive loss of seed  
199 biomass during plant handling. Twelve plants per treatment were harvested by cutting the roots  
200 at the potting mix line and trimming and/or folding the aerial parts into tared envelopes (Top Flight  
201 no.10 Security Envelope, Strip & Seal). Fresh weight was recorded immediately after harvesting  
202 was complete. Plants were dried at room temperature (20-22°C) for 2 weeks and re-weighed for  
203 the dry biomass. All envelope and plant biomass measurements were taken on a Mettler Toledo  
204 PG2002-S scale.

205 *Seed collection*

206 Five plants were randomly selected for seed collection. ARACON tubes (Arasystem, Belgium)  
207 were installed over the rosette. When the remaining plants were harvested for biomass, these  
208 five plants were moved to a drying room for two weeks. Dry plant material was collected and  
209 stored in wax paper bags until processing. Seeds were isolated from plant material by manually  
210 massaging the bags to release seeds, filtering through a Rösle Stainless Steel Fine Mesh Tea  
211 Strainer (Wire Handle, 3.2-inch, model# 95158) to remove large plant debris, repeatedly passing  
212 over copier paper, and picking out remnant plant matter with tweezers. Cleaned seeds were  
213 collected in tared 2 mL Eppendorf tubes and weighed on a Mettler Toledo AB104-S/FACT scale.  
214 To determine average seed mass, approximately 14 mg of seeds per sample were weighed on  
215 an ultrasensitive balance, adhered to a piece of white paper using a glue stick, covered by clear  
216 packing tape, scanned, and counted by image analysis in ImageJ following protocols optimized  
217 by Dr. Mathew Greishop's lab, based on the work of Mark Ledebuhr (Supplementary Materials  
218 and Methods, **Supplementary Fig. S2**).

219 *Statistical analysis*

220 Since the data were non-normal, we performed Wilcox ranked sum tests and adjusted p-values  
221 for multiple comparisons using the Holm method. Between NVP64cu v. NVP64wt, NVP80cu v.  
222 NVP80wt, and NoMillet v. Uninoculated, we used two-tailed tests. Between each fungal treatment  
223 and the Uninoculated, we performed one-tailed tests with the alternative hypothesis being “less”  
224 or “greater” as appropriate. Data analysis and visualization was conducted in R using the ggpubr  
225 and ggsignif packages [24,25]. Datasets and code are available at [https://github.com/natalie-](https://github.com/natalie-vandepol/Arabidopsis-L.elongata-PGP)  
226 [vandepol/Arabidopsis-L.elongata-PGP](https://github.com/natalie-vandepol/Arabidopsis-L.elongata-PGP).



## 227 **Agar-based experiments**

### 228 Transplanting & inoculation

229 We based the design of these experiments on the methodology used by Johnson et al.[12].  
230 Arabidopsis seeds were surface sterilized and germinated as described previously. Ten days after  
231 germination, seedlings were categorized into three approximate seedling size “categories”: too  
232 small, too big, and average. Three “average” seedlings were transplanted to each PNM plate such  
233 that the cotyledons aligned with the top line of the plate grid and the roots were not covered by  
234 the grid pattern (**Supplementary Fig. S1b**). Each plate was numbered as it was populated with  
235 seedlings so that plates could be assigned to treatments serially (e.g., 1-A, 2-B, 3-C, 4-A, 5-B,  
236 6-C, 7-A, etc.), to homogenize variation and bias in seedling size throughout the transplant  
237 procedure. Plates were inoculated by transferring two 5 mm x 5 mm squares of Kaefer Medium,  
238 sterile or colonized by the appropriate fungal culture, between the three seedlings.

### 239 Root length

240 After transplanting and inoculation, seedlings and fungi were left undisturbed overnight to allow  
241 them to adhere to the media and minimize the likelihood of movement during handling. The  
242 following day (1 day post inoculation), plates were imaged on an Epson scanner at 1200 dots per  
243 inch using Home mode and default settings (**Supplementary Fig. S1b**). Images were processed  
244 in ImageJ v.1.52p, using the 13 mm grid on the plates as a scale, the freehand line tool to trace  
245 the roots, and the measuring tool to determine starting root length of each seedling.

### 246 Growth chamber

247 Light levels were measured with a LI-250A light meter (LI-COR) at 9 different points on each of  
248 the four shelves in the growth chamber (**Supplementary Table S1**). To homogenize variability in  
249 environmental conditions across treatments, plates were distributed between light level regions  
250 and the lower three shelves as evenly as possible and their location in the chamber recorded.  
251 Each of the shelves accommodate 3 rows of 15 plates, with 5 plates assigned to each of the 9  
252 zones on the shelf (**Supplementary Fig. S3**).

### 253 Bolting panel

254 To determine whether bolting time was affected by fungal colonization, PNM plates with 10 day  
255 old Arabidopsis seedlings were inoculated and monitored daily for evidence of bolting, which was  
256 defined as visible elongation of the emerging inflorescence away from the rosette  
257 (**Supplementary Fig. S4**). As each plant bolted, the date was noted on the plate.

258 Harvesting aerial plant material

259 At 12 DPI (22 days old), the aerial portion of each plant was cut away from the roots and placed  
260 into a folded “envelope” made from weighing paper and dried in a 65°C drying oven for 48 hours.  
261 The envelopes of dried plants were stored in empty tip boxes and double bagged with Ziplock  
262 bags to prevent reabsorption of atmospheric water before weighing. Dry plants were weighed on  
263 a DeltaRange XP26 ultrasensitive balance (Mettler Toledo; Ohio, USA).

264 Statistical analysis

265 We conducted statistical analyses in R v.3.6.0 using the tidyverse v1.3.0, lme4 v1.1-21, lmerTest  
266 v3.1-1, car v3.0-6 packages [26–30]. Bolting data were visualized as boxplots and visibly non-  
267 normal. We used the Kruskal-Wallis test to examine differences in bolting age between treatments  
268 [31].

269 Aerial dry weight data were visualized as boxplots and assessed as approximately normal and  
270 homoskedastic. We used analysis of variance (ANOVA) and linear models to examine differences  
271 in dry weight within each experimental dataset to determine the effects of environmental factors  
272 tested by each experiment. Based on the results of these tests, we constructed a linear mixed  
273 model of the combined dry weight data from the two agar experiments, specifying treatment and  
274 seedling root length as fixed effects and experiment (Media Panel & Cured Panel) and plate (to  
275 account for three plants measured per plate) as grouping factors:

276 
$$\text{DryWeight} \sim \text{Treatment} + \text{RootLength} + (1 \mid \text{Experiment} : \text{Plate})$$

277 We used the emmeans v1.4.4 package to perform pairwise comparisons of the model estimates  
278 for each treatment [32]. The estimated marginal mean, confidence interval, and significance  
279 groups were extracted for graphical summarization.

280 Root microscopy

281 Seedlings were grown on MS plates (see above) for five days post-stratification, then transferred  
282 to PNM plates, with four seedlings per plate, approximately 1 cm from the plate edge. Two ~5 mm  
283 x 10 mm blocks of MEA colonized with mycelium of *L. elongata* NVP64cu or NVP80cu were  
284 placed on the centerline of the plate, spaced between plants 1 and 2 then 3 and 4. The plates  
285 were sealed with parafilm and arranged vertically in a Percival I-36LLVL growth chamber at 75  
286  $\mu\text{mol}/\text{m}^2 \cdot \text{s}$  PAR with 16 hr day & 8 hr night, 22°C, 60% relative humidity. Roots were sampled at  
287 13 DPI (18 days old) and again at 23-25 DPI (28-30 days old).

288 Roots were cut from shoots using a scalpel, then forceps were used to transfer roots to 200  $\mu$ L of  
289 stain solution or 1x PBS, pH 7.2, in a 500  $\mu$ L conical tube. The stain solution was composed of  
290 25  $\mu$ g/mL WGA-640R (Biotium, California, USA) and 1 mg/mL calcofluor white M2R, in 1x PBS,  
291 pH 7.2. Vacuum was applied to the roots in liquid with a vacuum pump, three times for 30 s each,  
292 releasing the pressure after each time. The roots in stain or buffer were incubated at room  
293 temperature for 30 min on a table shaker at 60 rpm.

294 Roots were removed from the stain solution and placed on glass slides, then coverslips were  
295 added. Roots were imaged using an Olympus Fluoview FV10i confocal laser scanning  
296 microscope. The unstained roots were viewed first and used to calibrate sensitivity values. The  
297 WGA-640R channel was viewed with  $\lambda_{\text{ex}} \sim 642$  nm,  $\lambda_{\text{em}} \sim 661$  nm and the calcofluor white M2R  
298 channel was viewed with  $\lambda_{\text{ex}} \sim 352$  nm,  $\lambda_{\text{em}} \sim 455$  nm. The micrographs were processed,  
299 recolored, and transformed in ImageJ v1.53h [33] and 3D Slicer v4.11.20210226 [34].

## 300 **RNA sequencing & differential gene expression**

### 301 Root harvesting & storage

302 The root material for the RNAseq experiment was collected from the plants generated in Agar  
303 experiments (**Fig. 1**, see Agar-based experiments: Harvesting aerial plant material Methods  
304 section). Before collecting the aerial parts of the plants for biomass assays, five plates were  
305 selected from each treatment on the basis of similar light levels within the chamber. For each  
306 selected plate, two RNase-zap treated, DEPC water rinsed, autoclaved steel beads were placed  
307 in one RNase-free 1.5 mL Eppendorf tube, handled with gloves treated with RNase-zap.  
308 Eppendorf tubes were placed in an autoclavable tube box, open and upright, the box wrapped in  
309 foil and autoclaved for 25 minutes on a dry cycle. After autoclaving, wearing RNase-zap treated  
310 gloves, the Eppendorf tubes were carefully removed from the box, closed, and labeled with the  
311 numbers of the plates from which the roots were to be collected.

312 During harvest, each selected plate was removed individually from the chamber, opened, and the  
313 roots collected with forceps and a scalpel. The roots were immediately placed in a cold Eppendorf  
314 tube and flash frozen in liquid nitrogen. The time between removing the plate from its place in the  
315 chamber to freezing the Eppendorf tube and roots did not exceed 30 seconds. The forceps and  
316 scalpel were soaked in 10% bleach between samples and excess liquid wicked off by a paper  
317 towel before contacting the roots. The Eppendorf tubes of root samples were stored at  $-80^{\circ}\text{C}$  prior  
318 to extracting RNA.

319 RNA extraction

320 Tissue was homogenized by three 30 second bursts at 30Hz in a TissueLyzer II (Qiagen;  
321 Germany), with 30 second rests in liquid nitrogen between each burst. RNA was extracted using  
322 a Qiagen RNEasy Plant Mini Kit, employing 450  $\mu$ L Buffer RLT lysis buffer (with 10  $\mu$ L  $\beta$ -ME per  
323 1 mL Buffer RLT), an on-column DNase digest (RNase-Free DNase Set, Qiagen), and eluting 2x  
324 with 50  $\mu$ L RNase free water. A 5  $\mu$ L aliquot was set aside to perform an initial quantification using  
325 a NanoDrop. Samples with less than 75  $\mu$ g/mL were concentrated by ethanol precipitation as  
326 described below. RNA was quantified and quality checked using BioAnalyzer (MSU RTSF). All  
327 RNA samples had RIN scores >9.0.

328 RNA ethanol precipitation

329 Low concentration RNA extractions were amended with 10  $\mu$ L 3 M Sodium Acetate and then 300  
330  $\mu$ L ice cold 100% ethanol, vortexed briefly to mix, and precipitated at -20°C overnight. RNA was  
331 pelleted by centrifuging for 30 min at full speed at 4°C. The RNA pellet was washed with 200  $\mu$ L  
332 ice cold 70% EtOH and centrifuged for 10 min at full speed at 4°C. The supernatant was discarded  
333 and the pellet air-dried for 15 min on the bench before being resuspended in 30-50  $\mu$ L RNase-  
334 free water. A 5  $\mu$ L aliquot was taken for quantity and quality analysis and the remainder stored at  
335 -80°C.

336 Library preparation & sequencing

337 Libraries were prepared using the Illumina TruSeq Stranded mRNA Library Preparation Kit with  
338 the IDT for Illumina Unique Dual Index adapters following manufacturer's recommendations.  
339 Completed libraries were QC'd and quantified using a combination of Qubit dsDNA HS and  
340 Agilent 4200 TapeStation High Sensitivity DNA 1000 assays. The libraries were pooled in  
341 equimolar amounts and the pool quantified using the Kapa Biosystems Illumina Library  
342 Quantification qPCR kit. This pool was loaded onto an Illumina NextSeq 500/550 High Output  
343 flow cell (v2.5) and sequencing performed in a 1x75 bp single read format using a NextSeq  
344 500/550 High Output 75 cycle reagent kit (v2.5). Base calling was done by Illumina Real Time  
345 Analysis (RTA) v2.4.11 and output of RTA was demultiplexed and converted to FastQ format with  
346 Illumina Bcl2fastq v2.19.1. Sequence data have been accessioned in NCBI's SRA under the  
347 BioProject PRJNA704083.

348 qPCR

349 Primer sets for qPCR were designed using 16S rRNA gene sequences of *L. elongata* NVP64 and  
350 NVP80 endobacteria with the IDT PrimerQuest® Tool for 2 primers and intercalating dye  
351 (**Supplementary Table S2**). Primer sets were verified using wild-type DNA samples, for which a

352 standard curve was created with dilutions from 100 to 10<sup>-4</sup> and efficiencies were within 90-110%.  
353 Absolute copy number calibration was not performed because only presence/absence validation  
354 was required. cDNA was synthesized for qPCR quantification using the LunaScript RT SuperMix  
355 Kit (New England Biolabs; Massachusetts, USA). qPCR reactions were composed of 7.5  $\mu$ L  
356 Power SYBR Green PCR Master Mix (ThermoFisher Scientific; Massachusetts, USA), 5.5  $\mu$ L  
357 nuclease-free water, 0.25  $\mu$ L each primer, and 1.5  $\mu$ L of undiluted template. The reaction cycle  
358 was 95°C for 10 min, followed by 40 cycles of 95°C for 15 sec and 60°C for 1 min with a  
359 fluorescence measurement. A melting curve was performed following amplification: 95°C for 15  
360 sec and 60°C for 15 sec, then a 20 min ramp up to 95°C, followed by 95°C for 15 sec. At least  
361 two reactions were performed per sample and primer combination.

### 362 Sequence analysis

363 Raw, demultiplexed reads were quality trimmed and filtered using Trimmomatic v.0.38 [35]. A  
364 combined reference transcriptome was constructed from the Arabidopsis Thaliana Reference  
365 Transcript Dataset 2 (AtRTD2\_19April2016.fa, accessed 10/21/2019) and *Linnemannia elongata*  
366 AG77 (Morel2\_GeneCatalog\_transcripts\_20151120.nt.fasta.gz, project 1006314, accessed  
367 10/21/2019) [13,17]. This combined reference transcriptome was indexed in Salmon v0.11.3 and  
368 used to quasi-map the trimmed reads to transcripts [36].

### 369 Differential gene expression analysis

370 A transcript-to-gene (tx2gene) table was constructed in R v.3.6.0 for Arabidopsis gene  
371 annotations (AtRTD2\_19April2016.gtf.txt, accessed on 01/12/2020). Fungal reads were  
372 extremely rare in the dataset, thus, analyses focused solely on plant transcriptional responses  
373 [26,37]. Salmon quant.sf files were imported into R using tximport (type=salmon; Soneson et al.  
374 2015). Differential gene expression analysis was carried out with both the EdgeR package and  
375 the DESeq2 package in R [38–40]. Gene expression was computed for each treatment across  
376 the three biological replicates, with the control treatment specified as the reference level in the  
377 experimental design matrix. Differentially expressed genes were identified by contrasting each  
378 fungal treatment against the control. In DESeq2, gene lists from each comparison were filtered  
379 by an adjusted p-value of 0.05 and an absolute value of log<sub>2</sub> fold change (LFC) cutoff of 0.585,  
380 which corresponds to a fold change in expression of 1.5. We generated volcano plots of these  
381 pairwise comparisons using the EnhancedVolcano package in R [41]. In EdgeR, the gene list  
382 encompassed all four fungal treatments with a single p-value for each gene, so the EdgeR gene  
383 list was filtered by overall p-value and whether at least one fungal treatment LFC meeting the LFC  
384 cutoff [38,39]. The DESeq2 gene list was filtered to include only genes also present in the EdgeR

385 gene list. Since DESeq2 provided p-values for each comparison, we used the log2-fold change  
386 and adjusted p-value of the DESeq2 analyses to compose our final DEG table. Gene ontology  
387 was assigned by referencing TAIR and UniProtKB annotation databases and synthesizing the  
388 most detailed and supported annotations [42,43].

### 389 Functional enrichment

390 We generated a list of differentially expressed genes in response to at least a single fungal  
391 treatment. The list of up and down regulated genes were separately searched for functional  
392 enrichment using the clusterprofiler package in R. Code to reproduce the GO enrichment is  
393 publically available: [https://github.com/Aeyocca/00\\_Collab/tree/main/plant\\_fungal\\_interactions](https://github.com/Aeyocca/00_Collab/tree/main/plant_fungal_interactions)  
394 (last accessed 11-03-2021) [44].

## 395 **Results**

### 396 **Potting Mix Experiments**

#### 397 Linnemannia elongata increased mature Arabidopsis aerial dry biomass

398 All fungal treatments had significantly higher aerial dry biomass than the uninoculated millet  
399 control. Aerial dry biomass of full-grown Arabidopsis plants was not significantly different between  
400 NVP64cu and NVP64wt or between NVP80cu and NVP80wt (**Fig. 2**). Millet has previously been  
401 used as a fungal substrate for inoculating soil in plant-fungal symbiosis research [13,45]. A  
402 NoMillet control was initially included to test the assumption that the millet-based inoculum had  
403 no impact on the plants. However, the NoMillet controls had the highest aerial dry biomass of any  
404 experimental treatment, indicating that the millet carrier negatively impacts plant health. Thus,  
405 results of the potting mix experiments may be interpreted in terms of stress mitigation. In this  
406 case, the NoMillet control presents a baseline and the Uninoculated control is an unmitigated  
407 stress imposed by the millet grain. The fungal treatments generally fell between these two  
408 treatments, indicating partial mitigation of the stress imposed by the grain-based inoculum. Given  
409 that the exact nature of the stress imposed by the grain-based inoculum is unknown, we focused  
410 our analyses of these data on fungal treatments v. uninoculated control and relied on pure culture  
411 agar plate methods for subsequent experiments.

#### 412 Linnemannia elongata impacted Arabidopsis seed production

413 As with the aerial biomass, the total seed mass of NVP80cu and NVP80wt were significantly  
414 higher than the Uninoculated control (**Fig. 3Aa**). No significant differences in total or average seed  
415 mass were found between the isogenic isolate pairs, i.e. NVP64wt vs. NVP64cu and NVP80wt

416 vs. NVP80cu (**Fig. 3**). Unlike total seed mass, the average seed mass of the Uninoculated control  
417 was slightly higher than NVP80wt and NVP64cu, but not significantly different from the NoMillet  
418 control (**Fig. 3b**). The total seed mass in the NoMillet control was significantly higher than that of  
419 the Uninoculated control.

420 Given the potential that sufficient seeds in the fungal treatments could be smaller due to  
421 incomplete development, rather than total reduction in seed size, we set out to determine whether  
422 this might be visible in violin plots of individual seed pixel areas from the image analysis. This  
423 would be represented by a bimodal violin with peaks representing immature and mature seeds.  
424 No strong bimodality could be seen in replicates or treatments (**Supplementary Fig. S5**).

## 425 **Agar Experiments**

### 426 Linnemannia elongata did not impact the timing of Arabidopsis bolting

427 The Kruskal-Wallis Test was conducted to examine the age at which plants bolted according to  
428 fungal treatment. With 27 plates per treatment and 3 plates per plate, no significant differences in  
429 bolting time ( $H=4.92$ ,  $p=0.296$ ,  $df=4$ ) were found between the five treatments. The mean age at  
430 which an inflorescence could first be seen to elongate from the rosette was 22 days old, which  
431 was 12 days post transplanting and inoculation (DPI). Therefore, we harvested all further agar  
432 experiments at 12 DPI to prevent bolting from affecting dry weight data, which differed from the 7  
433 day co-cultivation time used by Johnson et al. (2019) (**Fig. 1**).

### 434 Linnemannia elongata increased young Arabidopsis aerial dry biomass

435 We expected that several environmental factors could potentially impact our observation of how  
436 Arabidopsis responds to *L. elongata*. These included the (1) starting size of the plant; (2) local  
437 light level, (3) medium on which the fungus was cultured, and (4) process by which the fungi were  
438 cured of their endobacteria. We determined that there was no statistically significant correlation  
439 between light level and harvested plant dry weight in any of the treatments (**Supplementary**  
440 **Table S3**). We performed linear modeling of the dry weights as a function of medium, treatment,  
441 and interaction between those, and determined there were no significant differences in harvested  
442 plant dry weight based on media ( $F_{1,110}=0.966$ ,  $p=0.328$ ; **Supplementary Table S4**) and no  
443 significant interaction between medium and treatment ( $F_{4,110}=0.331$ ,  $p=0.857$ ). Analysis of  
444 variance found no statistically significant differences in mean harvested plant dry weight, between  
445 three independently generated cured lines (L0, L1, and L2) of *L. elongata*, for both NVP64  
446 ( $F_{2,42}=0.443$   $p=0.645$ ) and NVP80 ( $F_{2,42}=1.966$ ,  $p=0.153$ ), indicating that differences between  
447 wild-type (wt) and cured (cu) strains are likely due to the presence/absence of endobacteria,

448 rather than accumulated mutations from the antibiotic passaging protocol. Analysis of variance in  
449 seedling root length showed that the mean seedling root length was consistent between  
450 treatments of each experiment ( $F_{4,755}=0.953$ ,  $p=0.433$ ), but differed significantly between  
451 experiments ( $F_{1,755}=267.3$ ,  $p=2e-16$ ), with no significant interaction effect ( $F_{4,755}=0.541$ ,  $p=0.706$ ).  
452 Preliminary linear model analysis showed a significant positive correlation between seedling root  
453 length and harvested plant dry weight, with no significant differences between the slope of this  
454 correlation across experiments or treatments (**Supplementary Table S5**). We fit a linear mixed  
455 model of combined aerial dry weight data from both experiments as a function of treatment and  
456 seedling root length. Results of this model can be seen in **Table 1**. The estimated marginal means  
457 of aerial dry weight was significantly higher in all four fungal treatments compared to the control,  
458 but there were no significant differences between fungal treatments (**Fig. 4**).

#### 459 All *Linnemannia elongata* strains colonize *Arabidopsis* roots evenly

460 We used the cycle number at which the fluorescent signal of the qPCR probe exceeded the  
461 threshold level to calculate the ratio of *L. elongata* RNA to *Arabidopsis* RNA in each reaction. This  
462 ratio represents the degree of fungal colonization of plant roots. There were no significant  
463 differences in this ratio between any of the fungal treatments ( $p>0.1$ ) and each lineage of  
464 endobacteria was detected only in the wild-type strains (**Supplementary Table S6**;  
465 **Supplementary Fig. S6**).

466 We visually assessed the ability of *L. elongata* NVP64cu and NVP80cu to grow on and into root  
467 tissue, and the localization of hyphae within the roots for plants grown on agar. At 13 DPI *L.*  
468 *elongata* had colonized the root rhizosphere, but no internal hyphae were observed for NVP80cu.  
469 However, by 23 DPI we observed NVP80cu hyphae within epidermal root cells and root hair cells,  
470 with clearly visible plant cell walls bounding the hyphae on all sides (**Fig 5a-f**). Similarly, we  
471 visualized NVP64cu growing to high density within epidermal cells at 25 DPI, and the mass of  
472 hyphae bounded by the plant cell wall (**Fig 5g-l**).

### 473 **Differential Gene Expression**

#### 474 Molecular results

475 We generated a total of 521.2 million sequence reads (39.1 Gb) at an average of 34.7 million  
476 (30.5-37.8M) sequence reads per sample, with an average of 97.64% (97.22-97.85%) mapping  
477 rate to the combined reference transcriptome. Of the mapped reads, an average of 99.82%  
478 (98.64-99.99%) mapped to plant transcripts (**Supplementary Table S7**). Thus, analyses were  
479 focused on plant responses to experimental treatments.



#### 480 *Arabidopsis* differentially expressed genes in response to *Linnemannia elongata*

481 We conducted initial RNAseq data exploration in DESeq2 to confirm consistent gene expression  
482 profiles between biological replicates of each condition. Our principal component analysis showed  
483 that all four fungal treatments clustered together and away from the control (**Supplementary Fig.**  
484 **S7**). However, there was no observed clustering by isogenic strain (NVP64 or NVP80) or by  
485 cured/wild-type. Indeed, NVP64cu and NVP80wt seem to be the most similar.

486 DESeq2 provided p-values for each comparison, and we used the log<sub>2</sub>-fold change (LFC) and  
487 adjusted p-value of the DESeq2 analyses to filter the expression patterns in the final DEG list.  
488 DESeq2 identified a total of 465 genes that were differentially expressed and met LFC and  
489 adjusted p-value cutoffs in at least one of the four fungal treatments as compared to the control.  
490 Of these, there were 301 differentially expressed genes (DEGs) in NVP64cu v. Control, 135 in  
491 NVP64wt v. Control, 142 in NVP80cu v. Control, and 213 in NVP80wt v. Control (**Supplementary**  
492 **Fig. S8**). EdgeR identified 679 genes as being differentially expressed at a collective adjusted p-  
493 value threshold, with at least one sample meeting the LFC cutoff. There were 376 DEGs in  
494 NVP64cu v. Control, 240 in NVP64wt v. Control, 282 in NVP80cu v. Control, and 319 in NVP80wt  
495 v. Control. We identified 385 DEGs present in both the EdgeR and DESeq2 differentially  
496 expressed genes results (**Supplementary Table S8; Fig. 6**).

497 Thirty-four plant genes were differentially expressed when inoculated with all of the four fungal  
498 treatments as compared to the uninoculated control, 55 in three fungal treatments, 114 in at least  
499 two fungal treatments, and 182 in only one fungal treatment (**Supplementary Table S8**).  
500 Differentially expressed genes responded in the same direction to treatments, with only one  
501 exception (**Supplementary Table S8**). **Table 2** highlights a subset of twenty five DEGs having  
502 particularly interesting gene function and consistent significance across multiple fungal  
503 treatments.

#### 504 *Gene Ontology enrichment of differentially expressed genes*

505 Next, we ran Gene Ontology enrichment analysis on the differentially expressed genes (DEGs)  
506 that responded to at least a single fungal inoculation. There were 172 upregulated and 212  
507 downregulated genes. Several biological processes were enriched among these DEGs (**Fig. 7**).  
508 In response to fungal treatment, upregulated genes were strongly enriched for “response to  
509 oxidative stress”, “defense response to bacterium”, and notably “defense response to fungus”.  
510 Down regulated genes were enriched for “response to extracellular stimulus” and “response to  
511 toxic substance”. Broadly, these functional enrichments suggest external stimuli pathways were  
512 highly fluctuating in response to fungal treatment.

## 513 Discussion

514 In this study, root symbiosis between *Arabidopsis thaliana* and *Linnemannia elongata* were  
515 characterized at the gene expression level and plants were phenotype for aerial plant growth and  
516 seed production. We were also able to compare the impact of strain and endosymbiont (BRE vs.  
517 MRE) on plant-fungal interactions since the two different *L. elongata* strains used harbored a  
518 different endosymbiont. Finally, we used RNA-seq to identify plant genes that are differentially  
519 expressed during *Arabidopsis-L. elongata* symbiosis in order to begin describing molecular  
520 mechanisms of interaction associated with plant growth promotion.

### 521 ***Linnemannia elongata* promotes *Arabidopsis* growth independent of endobacteria**

522 This is the first study to explicitly test the impact of endobacteria on *Linnemannia*-plant  
523 associations. We found that *L. elongata* increased aerial plant growth compared to uninoculated  
524 controls, irrespective of the presence of endobacterial and independent of harvesting before or  
525 after flowering. These growth promotion effects of *Linnemannia* are corroborated by recent  
526 studies of *L. elongata* inoculated maize, where *L. elongata* increased the height and dry aerial  
527 biomass of maize in V3-V5 early vegetative stages, which corresponds to when maize has begun  
528 relying on photosynthesis and the environment for resources, rather than seed resources [1,46].  
529 Both MRE and BRE infection negatively impacts the growth of *Linnemannia*, thus, it is interesting  
530 that neither BRE nor MRE had a significant impact on plant growth in either experimental system  
531 [16,17]. However, NVP80wt (with MRE) did show a weak trend towards smaller plants than  
532 NVP80cu in the potting mix experiment (**Fig. 2**).

533 Previous studies have shown the *L. elongata* increases *Calibrachoa* flower production [45]. We  
534 demonstrate here that *L. elongata* fungal treatments had a strong positive effect on *Arabidopsis*  
535 seed size and total seed number. This may be an important plant trait to consider when assessing  
536 fitness costs of plant-associated microbes. Both NVP80cu and NVP80wt treatments had  
537 significantly higher total seed number compared to uninoculated millet controls, however, this was  
538 not the case for NVP64 inoculated treatments indicating strain variation. Interestingly,  
539 uninoculated millet control plants had a higher average seed size compared to some of the fungal  
540 treatments (**Fig. 3b**). While it is difficult to draw strong conclusions with so few replicates, it would  
541 be interesting to specifically test whether this represents a fitness strategy in which plants grown  
542 under stressful conditions create fewer, larger seeds to increase offspring fitness, whereas  
543 healthy plants can produce a higher number of smaller seeds because each will need fewer  
544 starting resources to survive and reproduce [47,48].

## 545 ***Linnemannia elongata* colonizes Arabidopsis root cells**

546 Following extended co-culture of Arabidopsis and *L. elongata*, hyphae of *L. elongata* were  
547 observed to colonize root cells of Arabidopsis intracellularly. The intracellular hyphae were  
548 contained within epidermal cells, including those both with and without root hairs (**Fig 5**). Stained  
549 roots appeared healthy, but we are unable to determine if the root cells containing hyphae were  
550 still alive, or any distinctive function of intracellular hyphae. Intracellular hyphae are especially  
551 known from arbuscular mycorrhizal fungi, which produce highly branched arbuscules within the  
552 root cells of their host and provide an extensive exchange surface for nutrients [49]. As opposed  
553 to hyphae contained solely to the apoplast, these intracellular hyphae suggest a stronger  
554 relationship between the host and fungus which could allow for exchange of nutrients,  
555 phytohormones, or other metabolites. Yet, *Serendipita (Piriformospora) indica* requires dead root  
556 cells for entrance into roots, but still provides benefits to the host [50]. Without further experiments  
557 to characterize nutrient exchange through these intracellular structures, it is not possible to  
558 ascribe structure with function [51].

## 559 ***Linnemannia elongata* may regulate Arabidopsis defense and abiotic stress** 560 **responses**

561 Up-regulated gene enrichments allow us to speculate on the transcriptional response of *A.*  
562 *thaliana* to *Linnemannia*. Several genes in the peroxidase superfamily III were upregulated in  
563 response to fungal inoculation. Nearly all these genes contain a signal peptide tagging them for  
564 export out of the cell [52]. Indeed, some are known to be involved in cell wall remodeling [53,54],  
565 a process that must occur to establish mutualism. However, they are also involved in defense  
566 responses against pathogens. We propose a few alternative hypotheses why previously  
567 described defense responses are upregulated in a mutualistic interaction. First, the assigned gene  
568 ontology may inaccurately reflect the true function of these genes. They may be involved in  
569 mutualism, but if it was not previously shown, these genes will lack that GO term. Second, the  
570 upregulation of genes involved in defense response might be a priming response by *A. thaliana*  
571 as previously shown by Johnson et al. [12].

572 A number of plant hormones mediate the initiation and maintenance of plant-microbe symbioses,  
573 including auxins (most commonly IAA), jasmonates/jasmonic acid (JA), salicylic acid (SA),  
574 abscisic acid (ABA), ethylene (ET), and brassinosteroids (BRs). These hormones can be  
575 produced by both the plant and microbial symbionts and are often required to appropriately  
576 suppress and redirect the plant defense response in order for the microbe to establish symbiosis.

577 The regulation and importance of each hormone is specific to the type of interaction (e.g.  
578 pathogen vs. mutualists) as well as the species of plant and microbe that are interacting. For  
579 example, ethylene suppresses AMF colonization, but promotes EM colonization [55–57].  
580 Similarly, the beneficial non-mycorrhizal fungi *L. hyalina* and *Serendipita* (= *Piriformospora indica*)  
581 stimulate plant production of jasmonic acid and salicylic acid, respectively, when initiating  
582 symbiosis with *Arabidopsis* [58,59]. While this study did not include direct measurement of  
583 phytohormone levels, we did identify several DEGs related to the biosynthesis and signaling of  
584 ethylene, auxin, and abscisic acid, which are discussed below.

### 585 Root Development and Auxin

586 We observed many upregulated genes in response to fungal inoculation that were previously  
587 shown to be upregulated during root development. This is interesting since development and  
588 stress response pathways overlap in plants [60,61]. Many fungi synthesize and secrete auxin, a  
589 hormone well known to impact plant growth. *Podila verticillata* (= *Mortierella verticillata*) and *M.*  
590 *antarctica* both synthesize IAA and were shown to improve winter wheat seedling growth [15].  
591 The genome of *L. elongata* (strain AG77) has the key genes of IAA synthesis and maize roots  
592 inoculated with *L. elongata* had a 37% increase in IAA concentration [1]. Our study found that *L.*  
593 *elongata* suppressed *Arabidopsis* auxin biosynthesis genes (*NIT2* and *GH3.7*), but up-regulated  
594 several auxin-responsive genes. Given that 1) *Arabidopsis* auxin biosynthesis is being down-  
595 regulated, 2) auxin synthesis is generally self-inhibitory in plants, and 3) auxin response genes  
596 are up-regulated, we hypothesize that the *Arabidopsis* roots are responding to *L. elongata*-derived  
597 auxins [62]. However, *Arabidopsis* auxin-related genes did not respond to initial or established *L.*  
598 *hyalina* colonization, even though *Arabidopsis* roots had a 3-fold increase in IAA concentration  
599 during initial colonization as compared to control roots [12,58]. Moreover, some IAA was of fungal  
600 origin, as *L. hyalina* mycelium alone had a significantly higher IAA concentration than the tested  
601 pathogenic fungi [58]. It is worth noting that their assay did show a very brief response to auxin  
602 that quickly dissipated to background gene expression levels. Since we found increased auxin  
603 responsive gene expression during well-established symbiosis, our data indicate *L. elongata* may  
604 employ a different phytohormone regulatory strategy compared to *L. hyalina*.

605 Enhanced aerial plant growth by auxin-producing microbes is attributed to improved root  
606 structure, particularly lateral root growth, but assessing the impact of Mortierellaceae fungi on  
607 plant root development is not so straightforward [1]. Johnson et al. [12] found that *L. hyalina* had  
608 a slight, but significant negative impact on *Arabidopsis* root dry biomass compared to  
609 uninoculated plants; they identified three root development (*SHR*, *CPC*, and *AHP6*) genes that

610 responded to *L. hyalina* as opposed to the plant pathogen *Alternaria brassicae*. These genes  
611 were not among the DEGs identified in our study. However, we did find that the entire operon-like  
612 gene set related to thalianol biosynthesis and metabolism (*MRN1*, *MRO*, *THAS1*, *THAH*, and  
613 *THAD*) was downregulated by *L. elongata* [63–66]. Thalianol-related metabolites are predicted to  
614 function in promoting root development, but the mechanism is still under investigation [63]. Future  
615 research is needed to determine how each of these fungi impact Arabidopsis root development  
616 and how that relates to increased aerial plant growth.

### 617 Ethylene (ET)

618 Ethylene is a plant hormone involved in maturation, senescence, and response to biotic and  
619 abiotic stress. Decreasing the level of ethylene in plant tissues generally promotes plant growth.  
620 The role of ET in plant response to pathogens is well characterized and includes increased ET  
621 biosynthesis and signaling through a single conserved pathway, which includes proteins in the  
622 *TDR1* family [67]. However, the origin and role of ET in the initiation of beneficial plant-fungal  
623 symbioses is specific to the fungi involved. For instance, elevated ET appears to promote  
624 colonization by ectomycorrhizal fungi, but inhibits colonization by AMF [55–57]. Moreover, the ET  
625 signaling pathway is known to have multiple points of crossover with other hormone signaling  
626 pathways, including JA and cytokinin, some of which occur through the ERF family of transcription  
627 factors, including TDR1 [67]. In our study, we found that Arabidopsis colonized by *L. elongata*  
628 down-regulated ACC synthase *ACS7*, which synthesizes the metabolite 1-amino-cyclopropane-  
629 1-carboxylate (ACC), a precursor of ethylene. However, some genes related to ethylene signaling  
630 were up-regulated in response to *L. elongata*. Since ET biosynthesis is downregulated in  
631 Arabidopsis roots in response to *L. elongata*, it is possible that related response genes are up-  
632 regulated via other hormone pathways. There were only three DEGs specifically associated with  
633 JA signaling in our dataset but they were each significant in only one fungal treatment.

### 634 Abscisic acid (ABA), abiotic stress, & reactive oxygen species (ROS)

635 In general, we found that genes related to ABA and abiotic stress are down-regulated by *L.*  
636 *elongata*. These include the ABA synthesis enzyme *NCED3* and responses to drought, cold, salt,  
637 iron deficiency, potassium deficiency, phosphorous deficiency, and heavy metals. Many plant  
638 growth promoting fungi are thought to transport water and nutrients to plants, particularly  
639 phosphorus. Mortierellaceae species are known to solubilize phosphate and improve phosphorus  
640 uptake in plants [68]. Considering the availability of potassium, phosphorus, and iron in the PNM  
641 growth medium, it is striking that so many genes related to deficiencies of these nutrients were  
642 down-regulated compared to the control plants. There were two main exceptions to this reduction

643 in abiotic stress: oxidative stress responses and a group of RmlC-like cupins superfamily proteins  
644 whose function is unknown.

645 ROS are a common plant defense response to both beneficial and pathogenic microbes [69]. Both  
646 *L. hyalina* and *L. elongata* stimulate ROS-responsive genes, although the two ROS-responsive  
647 genes specifically tested by Johnson et al. [12] were not among the DEGs in our dataset. Six of  
648 the up-regulated oxidative stress genes were peroxidases. One was a raffinose synthase.  
649 Raffinose is thought to act as an osmoprotectant and ROS scavenger [70]. Finally, we observed  
650 down-regulation of uridine diphosphate glycosyltransferase *UGT74E2*, which responds to ROS  
651 and drought to convert the auxin IBA to IBA-Glc (Tognetti et al. 2010). ROS also stimulates  
652 conversion of IAA to IBA. Increased expression of *UGT74E2* further sequesters IBA and prevents  
653 oxidation back to IAA [71]. While no *UGT74E2* suppression or deletion mutant phenotypes have  
654 been reported, overexpression of *UGT74E2* leads to increased sensitivity to ABA [72]. In  
655 summary, we observe down-regulation of auxin synthesis, ABA synthesis and signaling, and an  
656 important gene connecting the ROS, ABA, and auxin pathways. From this, we infer that *L.*  
657 *elongata* stimulates ROS responsive genes, but these responses are isolated from other  
658 hormone pathways and limited to peroxidases and antioxidants.

### 659 Calcium signaling and plant defense

660 In addition to hormones, many plant-microbe interactions involve calcium signaling in plant roots  
661 [73]. *L. hyalina* symbiosis with Arabidopsis is activated by calcium signaling [12]. Calcium-  
662 signaling was required for the plants to receive pathogen protection by *L. hyalina*, and for *L.*  
663 *hyalina* to colonize Arabidopsis roots; however, signaling-deficient plants still showed the wild-  
664 type aerial growth promotion. This suggests a calcium-signaling dependent defense response to  
665 limit the rate of root colonization by *L. hyalina*. Johnson et al. [12] identified four Ca-signaling  
666 genes (At3g47480, At3g03410, At5g23950, and At3g60950) that specifically responded to *L.*  
667 *hyalina*, as opposed to the plant pathogen *Alternaria brassicae*. These genes were not among  
668 the DEGs identified in our study. However, our RNA-seq experiment did demonstrate an up-  
669 regulation of the calcium-signaling gene *CML12*, which is induced by both stress and hormone  
670 signals, including auxin, touch, darkness, oxidative stress, and herbivory [74,75].

671 DEG analyses indicate that *L. elongata* stimulated several general, fungal, and bacterial defense-  
672 related genes in Arabidopsis roots. However, we also noted suppression of genes involved in  
673 programmed cell death and production of defensin-like proteins meant to kill cells of invading  
674 organisms. As such, these defense responses could indicate both regulation of *L. elongata*  
675 colonization and a priming of the plant innate immune response, explaining the elevated

676 expression of definitively bacterial defense genes like *FLS2*. As noted in maize-*L. elongata*  
677 symbioses, *L. elongata* may curate auxin levels to colonize maize roots and suppress systemic  
678 defense through the salicylic acid pathway [1]. Further, this active microbial regulation of the plant  
679 immune response may promote plant growth in a field environment by limiting further resource  
680 allocation to defense when attacked by pathogens [1,76].

### 681 **Challenges of plant-fungi experiments**

682 There are challenges to introducing fungi to plants without simultaneously altering other factors.  
683 Experiments carried out in potting mixes reiterate that uninoculated grains in control treatments  
684 not only invite colonization by environmental contaminants, but the grains themselves may  
685 introduce a strong and consistent negative impact on plant growth. However, we found the potting  
686 mix experiment was technically sufficient to collect data about seed production, while the agar  
687 inoculation approach allowed for more controlled growth. Now that *L. elongata* has been verified  
688 to impact plant growth under these conditions, more extensive experiments can be justified to  
689 further explore plant-fungal interactions. The more controlled agar system is well suited for high-  
690 throughput assays of plant and fungal knock-out mutants to further isolate important genes and  
691 pathways involved in this symbiosis, and for assaying early life-stage aerial growth and root gene  
692 expression. However, semi-solid rooting conditions may not be representative of plants grown in  
693 soil or more real-world conditions. An improved potting mix system based upon a grain-free  
694 inoculation protocol would be ideal to non-destructively track plant growth over time and to  
695 construct a more detailed description of how *L. elongata* affects plant growth and development.

### 696 **The role of phytohormones in fungi**

697 While it is well established that fungi can manipulate and produce phytohormones, the effects of  
698 phytohormones on fungi are not well understood. Studies of plant hormone impacts on fungal  
699 growth and development are currently limited to a few plant pathogens and AM fungi. Exogenous  
700 ethylene is known to promote fungal spore germination and mycelial growth [77–79]. For example,  
701 exogenous ethylene is required for spore germination in species of *Alternaria*, *Botrytis*,  
702 *Penicillium*, and *Rhizopus* and often promotes mycelial growth [79]. It is worth noting that these  
703 fungal species infect fruit, and likely evolved through selection for spore germination in the  
704 presence of ripening fruit, limiting the relevance of those findings to mechanisms employed by  
705 root-associated fungi [78]. Gryndler et al. [80] found that exogenous auxin (IAA) repressed hyphal  
706 growth of two AM fungi, *Glomus fistulosum* and *G. mosseae*, at biologically relevant  
707 concentrations, but abscisic acid (ABA) and cytokinins had no perceivable effect until applied in  
708 concentrations very high, non-physiologically relevant, concentrations. The current model of

709 phytohormone regulation of AM fungi suggests that 1) SA inhibits pre-symbiotic growth; 2)  
710 ethylene, JA, and cytokinins inhibit symbiotic fungal growth inside plant roots; and 3) auxin, JA,  
711 and ABA promote the formation and function of arbuscules within plant root cells [81]. It is still  
712 unclear how these relationships and regulatory systems apply to the growth, development, or  
713 plant associations of *L. elongata*, but these are important questions to consider in future plant-  
714 fungal interaction studies.

## 715 **Conclusions**

716 In conclusion, we phenotyped Arabidopsis at early and late life stages during a stable symbiosis  
717 with *Linnemannia* in soil and agar-based media. We demonstrated that *L. elongata* promotes  
718 Arabidopsis above-ground vegetative growth and seed production. This plant phenotype was  
719 found to be independent of whether *L. elongata* isolates were colonized by MRE or BRE  
720 endohyphal bacterial symbionts. We hypothesize that the mechanism of plant-fungal symbiosis  
721 involves fungal production of auxin and stimulation of the ethylene and ROS response pathways.  
722 Future research is needed to test these hypotheses and further characterize the fungal side of  
723 this symbiosis.

## 724 **Acknowledgements**

725 We would like to thank Abigail Bryson and Bryan Rennick for their extensive assistance with  
726 setting up experiments, Xinxin Wang for assistance collecting Arabidopsis seeds from plant  
727 material, and Natalie Golematis for help with antibiotic passaging to cure fungal strains and DNA  
728 extractions for qPCR analyses. We would like to thank Dr. Zsofia Szendrei for generously  
729 providing access to her lab microbalance for weighing seeds and plants. We are grateful to Keith  
730 Koonter and Dr. Matthew Greishop for sharing their automated image analysis pipeline. Funding  
731 sources: GB acknowledges support from the US National Science Foundation DEB 1737898 and  
732 the US Department of Agriculture NIFA MICL02416.

733

## 734 **Author Contributions**

735 NVP - experiment design & completion, data collection, data analysis, manuscript writing

736 JL - generation of cured fungal isolates, qPCR, root harvesting, root microscopy, manuscript  
737 writing

738 AY - gene ontology analysis, manuscript writing



739 JM - statistical analysis of plant biomass data  
740 PE - supported RNASeq exp design & data analyses, manuscript writing  
741 GB - research support, experiment design, manuscript writing

742

## 743 **Figure & Table Captions**

### 744 [Figure 1 – Arabidopsis plants at the time of harvest for aerial biomass assay](#)

745 Ten days after germination, *Arabidopsis thaliana* seedlings were transplanted from 1xMS  
746 germination plates to these PNM plates and inoculated with small blocks of Kaefer Medium, either  
747 colonized by fungi (**left**) or sterile (**right**). The Arabidopsis (and fungi, when applicable) grew on  
748 PMN plates for 12 days, at which point these pictures were captured and the plants harvested for  
749 aerial biomass assays.

750

### 751 [Figure 2 – Aerial dry biomass of Arabidopsis plants grown in sterile potting mix](#)

752 *Arabidopsis thaliana* was grown to maturity and the aerial biomass harvested and dried.  
753 Treatments refer to the composition of the potting mix. The untreated control (NoMillet) contrasted  
754 treatments where the sterile potting soil was mixed 97:3 v:v with sterile millet mix (Uninoculated),  
755 or millet mix inoculated with one of four *Linnemannia elongata* strains (NVP64cu, NVP64wt,  
756 NVP80cu, or NVP80wt). Colors correspond to treatment, horizontal brackets and numbers  
757 indicate pairwise Wilcox ranked sum tests and the resulting p-value. N=12 for all treatments.  
758 Between NVP64cu v. NVP64wt, NVP80cu v. NVP80wt, and NoMillet v. Uninoculated, we used  
759 two-tailed tests. Between each fungal treatment and the Uninoculated, we performed one-tailed  
760 tests with the alternative hypothesis “greater”.

761

### 762 [Figure 3 – Total and Average Arabidopsis seed mass collected in potting mix experiments](#)

763 *Arabidopsis thaliana* was grown to maturity and the seeds collected by Aracon tubes. Treatments  
764 refer to the composition of the substrate in which Arabidopsis plants were grown. The NoMillet  
765 Control was autoclaved SureMix. All other treatments were autoclaved SureMix substrate mixed  
766 97:3 v:v with sterile grain-based inoculum (Uninoculated), or grain-based inoculum colonized by  
767 one of four *Linnemannia elongata* strains (NVP64cu, NVP64wt, NVP80cu, or NVP80wt). N=5 for  
768 all treatments. Colors correspond to treatment, horizontal brackets and numbers indicate pairwise

769 Wilcoxon ranked sum tests and the resulting p-value. Between NVP64cu v. NVP64wt, NVP80cu v.  
770 NVP80wt, and NoMillet v. Uninoculated, we used two-tailed tests. Between each fungal treatment  
771 and the Uninoculated, we performed one-tailed tests with the alternative hypothesis “greater” for  
772 total seed mass & “less” for average seed mass. **a)** Total seed mass collected. **b)** Average seed  
773 mass was determined by weighing and then counting a subset of seeds taken from the total seed  
774 mass.

775

776 Figure 4 – *Linnemannia elongata* colonization of *Arabidopsis* increased aerial dry weight in agar-  
777 based interaction experiments

778 The estimated marginal mean of *Arabidopsis thaliana* aerial dry weight, modeled as a function of  
779 starting root length and treatment with nested effects for experiment iteration (3 independent  
780 iterations) and agar plate (3 plants per plate). Treatments included the uninoculated control and  
781 four strains of *Linnemannia elongata*. N=39 plates for Control, NVP64wt, and NVP80wt, nN=69  
782 plates for NVP64cu and NVP80cu. The degrees of freedom for each comparison were  
783 approximated using the kenward-roger method and the p-values adjusted for multiple  
784 comparisons using the Tukey method for comparing a family of 5 estimates. Letters indicate  
785 significantly different groups with an alpha value of 0.05. Exact values can be found in **Table 1**.

786

787 [Figure 5 – Colonization of \*Arabidopsis\* roots by \*L. elongata\*.](#)

788 **a-f)** NVP64cu at 25 days post inoculation, **g-l)** NVP80cu at 23 days post inoculation. **a,g)**  
789 Fluorescence signal from calcofluor white M2R staining; **b,h)** signal from wheat germ agglutinin  
790 640R staining **c-f,i-l)** merged fluorescence. **d-f,j-l)** Orthogonal z-stack projections of root  
791 micrographs. **a-l)** White arrows indicate plant wall structures showing hyphae (blue) contained  
792 within intracellular spaces by plant cell walls (red). Scale bars represent 20  $\mu$ m.

793

794 Figure 6 – Abundance of differentially expressed *Arabidopsis* genes

795 *Arabidopsis thaliana* genes differentially expressed (DEGs) in roots colonized with *Linnemannia*  
796 *elongata* as compared to the uninoculated control, identified using DESeq2 with fold-change  
797 threshold of 1.5 and p-value threshold of 0.05. **a)** A Venn diagram of all DEGs in the final, filtered  
798 dataset. **b)** A bar graph of all DEGs, split between up- and down-regulated. **c-d)** Venn diagrams  
799 of **c)** up- and **d)** down-regulated DEGs identified for each fungal treatment.

800

801 [Figure 7 - GO enrichment of up and down regulated genes](#)

802 The ten GO categories with the strongest enrichment are displayed for both **a)** up and **b)** down  
803 regulated genes in response to fungal treatment. Color corresponds to the adjusted p-value  
804 according to the Benjamini-Hochberg Procedure while dot size corresponds to the number of  
805 differentially expressed genes matching a given GO category.

806

807 [Supplementary Figure S1– Arabidopsis seedlings used in plant-fungal interaction assays](#)

808 Panel **a)** 10-day old *Arabidopsis thaliana* seedlings on 1xMS germination plates and **b)** 11-day  
809 old Arabidopsis seedlings and blocks of media (colonized by fungi in fungal treatments or sterile  
810 in uninoculated control treatments) as arranged on PNM plates for the agar-based plant-fungal  
811 interaction experiments.

812

813 [Supplementary Figure S2 – Seeds to be counted by image analysis](#)

814 *Arabidopsis thaliana* was grown to maturity and the seeds of each plant collected by Aracon tubes  
815 and stored in Eppendorf tubes. After careful cleaning of the seed to remove stems, petals, and  
816 other plant debris, approximately 14 mg of seeds per sample were weighed on an ultrasensitive  
817 balance, adhered to a piece of white paper using a glue stick, covered by clear packing tape,  
818 scanned, and counted by image analysis in ImageJ. **a)** The scanned image of the subsampled  
819 seeds. **b)** The image analysis output, with areas identified as a “seed” outlined in red.

820

821 [Supplementary Figure S3 – Agar plates with Arabidopsis plants in the growth chamber](#)

822 *Arabidopsis thaliana* seeds germination and *Arabidopsis-L. elongata* interaction studies were  
823 conducted on agar plates. These were incubated in a Percival growth chamber. Plates were  
824 stacked on a gentle angle to encourage smooth directional root growth along the agar surface.

825

826 [Supplementary Figure S4 – Bolting phenotype](#)

827 The arrow indicates the elongation of the *Arabidopsis thaliana* inflorescence away from the rosette  
828 of leaves which was considered to indicate “bolting.”

829

830 [Supplementary Figure S5 – Violin plots of Arabidopsis seed image area](#)

831 *Arabidopsis thaliana* was grown to maturity and the seeds collected by Aracon tubes. Facet  
832 names indicate the composition of the potting mix in which Arabidopsis plants were grown. The  
833 untreated control (NoMillet) contrasted treatments where the sterile potting soil was mixed 97:3  
834 v:v with sterile millet mix (Uninoculated), or millet mix inoculated with one of four *Linnemannia*  
835 *elongata* strains (NVP64cu, NVP64wt, NVP80cu, or NVP80wt). A subset of seeds from 5 samples  
836 per treatment (sample indicated by 'Rep') were adhered to white paper and imaged using an  
837 Epson scanner. The y-axis indicates the pixel count of each individual seed scanned for each rep  
838 and treatment using ImageJ.

839

840 [Supplementary Figure S6 – Linnemannia elongata strains equivalently colonized Arabidopsis](#)  
841 [roots](#)

842 RNA was extracted from *Arabidopsis thaliana* roots colonized by *Linnemannia elongata*, pooled  
843 from all three plants on each agar plate, from three plates per treatment. The inferred ratio of  
844 fungal:plant cDNA is based on the qPCR results and standard curves for each qPCR primer set.  
845 Since Arabidopsis GADPH and *L. elongata* RPB1 are single copy genes, the ratio of fungal and  
846 plant template provides a normalized estimate of fungal colonization of plant roots.

847

848 [Supplementary Figure S7 – Principal component analysis of differential Arabidopsis gene](#)  
849 [expression](#)

850 *Arabidopsis thaliana* root RNAseq data analyzed using DESeq2, sequenced from three biological  
851 replicates taken from each of the uninoculated control and fungal treatments inoculated with  
852 *Linnemannia elongata*.

853

854 [Supplementary Figure S8– Volcano plots of differential gene expression](#)

855 Pairwise comparisons of normalized *Arabidopsis thaliana* gene expression between fungal  
856 treatments and the uninoculated control, calculated from the DESeq2 analyses. Each point  
857 represents a gene, plotted by adjusted p-value and Log2 Fold Change (LFC) in expression  
858 between the fungal treatment and the control. Vertical dashed lines indicate the |LFC|=1 threshold  
859 and horizontal lines indicate the adjusted p-value threshold of 0.05 used to identify genes with

860 significant changes in expression. Genes are colored by which of the LFC and p-value cutoffs  
861 were exceeded: gray = failed both; green = exceeded only the LFC cutoff, but not the p-value  
862 cutoff; blue = exceeded p-value cutoff, but not LFC; red = exceeded both cutoffs.

863

864

865

866 Table 1 – Linear mixed modeling of Arabidopsis aerial dry weight

867 To account for having measurements for three plants per agar plate and two independent  
868 repetitions of the agar-based interaction experiment, experimental round and plate were treated  
869 as random/grouping effects. The starting root length and experimental treatment were fixed  
870 effects, where the uninoculated control treatment was estimated as the intercept.

871

872 Table 2 – Subset of Arabidopsis genes differentially expressed in response to Linnemannia  
873 elongata

874 A subset of twenty five DEGs having particularly interesting gene function and consistent  
875 significance across multiple fungal treatments. Log 2 fold change (LFC) values were calculated  
876 by DESeq2 and filtered at  $|LFC| = \log_2(1.5) = 0.58$  and adjusted p-value = 0.05. Table is organized  
877 first by functional annotation, then by direction of regulation, and finally by the number of fungal  
878 treatments in which the gene was differentially expressed.

879

880 Supplementary Table S1 – A map of the light levels in the growth chamber

881 *Arabidopsis thaliana* seeds germination and *Arabidopsis-L. elongata* interaction studies were  
882 conducted on agar plates. These were incubated in a Percival growth chamber. Each shelf in the  
883 chamber was divided into nine regions and the light level in each region was measured using an  
884 LI-250A light meter (LI-COR) with the chamber door closed to ensure realistic conditions. Light  
885 levels on the middle and bottom shelves were measured after arranging agar plates on the above  
886 shelf/shelves.

887

888 Supplementary Table S2 – qPCR primer sets

889 The qPCR primer sets used to quantify fungal colonization of plant roots and check for BRE/MRE

890 in cured and wild-type fungal strains and fungus-colonized plant roots.

891

892 Supplementary Table S3 – Linear modeling of Arabidopsis aerial dry weight as a function of light  
893 level

894 The aerial dry biomass of *Arabidopsis thaliana* plants harvested from agar-based Arabidopsis-  
895 *Linnemannia elongata* interaction experiments and modeled as a function of light level. Medium  
896 indicates the composition of the medium on which *L. elongata* was cultured: KM = Kaefer Medium;  
897 MEA = Malt Extract Agar. Treatment indicates the strain of *L. elongata* with which Arabidopsis  
898 was inoculated or the uninoculated control.

899

900 Supplementary Table S4 – Linear modeling of Arabidopsis aerial dry weight as a function of  
901 treatment and medium

902 The aerial dry biomass of *Arabidopsis thaliana* plants from agar-based Arabidopsis-*Linnemannia*  
903 *elongata* interaction experiments, modeled as a function of treatment (control v. different strains  
904 of *Linnemannia elongata*), the medium on which the fungi had been cultured, and any interaction  
905 between those terms. We also conducted pairwise comparisons within treatments of the  
906 estimated marginal means (EMMs) for each inoculating medium.

907

908 Supplementary Table S5 – Linear modeling of Arabidopsis aerial dry weight as a function of  
909 starting seedling root length

910 The aerial dry biomass of *Arabidopsis thaliana* plants from agar-based Arabidopsis-*Linnemannia*  
911 *elongata* interaction experiments, modeled as a function of seedling starting root length. There  
912 were no significant differences in the slope of the relationship of starting root length to final aerial  
913 dry weight across experimental rounds or treatments.

914

915 Supplementary Table S6 – qPCR of plant, fungal, and endobacterial genes from RNA

916 Values indicate the mean (n=2) qPCR cycle number at which amplification reached the threshold  
917 of detection ( $C_t$ ) for each locus tested in each cDNA library from the *Arabidopsis thaliana* root  
918 RNA samples used in the RNAseq experiment. Dash = not tested. Arabidopsis GADPH and  
919 *Linnemannia elongata* RPB1 are single copy genes. The bacterial 16S gene is multicopy, which

920 was necessary for detection, since these endobacteria are in very low abundance in the fungal  
921 hyphae.

922

923 Supplementary Table S7 – Molecular results of RNA sequencing run

924 The number of sequenced reads passing initial filtration by the sequencer, the percentage of  
925 those reads that mapped to the combined reference transcriptome, and the proportion of mapped  
926 reads that mapped to plant or fungal transcripts.

927

928 Supplementary Table S8 – Arabidopsis genes differentially expressed in response to  
929 Linnemannia elongata

930 Log 2 fold change (LFC) values were calculated by DESeq2 and filtered at  $|LFC| = \log_2(1.5) = 0.58$   
931 and adjusted p-value = 0.05. Table is organized first by functional annotation, then by direction of  
932 regulation, and finally by the number of fungal treatments in which the gene was differentially  
933 expressed.

934

935

936 **Literature Cited**

- 937 1. Li F, Chen L, Redmile-Gordon M, Zhang J, Zhang C, Ning Q, et al. *Mortierella elongata* 's  
938 roles in organic agriculture and crop growth promotion in a mineral soil. *Land Degrad Dev.*  
939 2018;29: 1642–1651.
- 940 2. Bedini A, Mercy L, Schneider C, Franken P, Lucic-Mercy E. Unraveling the Initial Plant  
941 Hormone Signaling, Metabolic Mechanisms and Plant Defense Triggering the  
942 Endomycorrhizal Symbiosis Behavior. *Front Plant Sci.* 2018;9: 1800.
- 943 3. Spatafora JW, Chang Y, Benny GL, Lazarus K, Smith ME, Berbee ML, et al. Zygomycete  
944 Genealogy of Life (ZyGoLife): a phylum-level phylogenetic classification of zygomycete  
945 fungi based on genome-scale data. *Mycologia.* 2016.
- 946 4. Hooker JE, Jaizme-Vega M, Atkinson D. Biocontrol of plant pathogens using arbuscular  
947 mycorrhizal fungi. In: Gianinazzi S, Schüepp H, editors. *Impact of Arbuscular Mycorrhizas*

- 948 on Sustainable Agriculture and Natural Ecosystems. Basel: Birkhäuser Basel; 1994. pp.  
949 191–200.
- 950 5. Tedersoo L, May TW, Smith ME. Ectomycorrhizal lifestyle in fungi: global diversity,  
951 distribution, and evolution of phylogenetic lineages. *Mycorrhiza*. 2010;20: 217–263.
- 952 6. Vandepol N, Liber J, Desirò A, Na H, Kennedy M, Barry K, et al. Resolving the  
953 Mortierellaceae phylogeny through synthesis of multi-gene phylogenetics and  
954 phylogenomics. *Fungal Divers*. 2020;104: 267–289.
- 955 7. James TY, Kauff F, Schoch CL, Matheny PB, Hofstetter V, Cox CJ, et al. Reconstructing  
956 the early evolution of Fungi using a six-gene phylogeny. *Nature*. 2006;443: 818–822.
- 957 8. Chang Y, Desirò A, Na H, Sandor L, Lipzen A, Clum A, et al. Phylogenomics of  
958 Endogonaceae and evolution of mycorrhizas within Mucoromycota. *New Phytol*. 2019;222:  
959 511–525.
- 960 9. Stiles W. On the Relation between the Concentration of the Nutrient Solution and the Rate  
961 of Growth of Plants in Water Culture. *Ann Bot*. 1915;29: 89–96.
- 962 10. Bisby GR, Timonin MI, James N. Fungi isolated from soil profiles in Manitoba. *Can J Res*.  
963 1935;13c: 47–65.
- 964 11. Domsch KH, Gams W, Anderson T-H, Others. Compendium of soil fungi. Volume 1.  
965 Academic Press (London) Ltd.; 1980.
- 966 12. Johnson JM, Ludwig A, Furch ACU, Mithöfer A, Scholz S, Reichelt M, et al. The Beneficial  
967 Root-Colonizing Fungus *Mortierella hyalina* Promotes the Aerial Growth of *Arabidopsis* and  
968 Activates Calcium-Dependent Responses That Restrict *Alternaria brassicae*--Induced  
969 Disease Development in Roots. *Mol Plant Microbe Interact*. 2019;32: 351–363.
- 970 13. Zhang K, Bonito G, Hsu C-M, Hameed K, Vilgalys R, Liao H-L. *Mortierella elongata*  
971 Increases Plant Biomass among Non-Leguminous Crop Species. *Agronomy*. 2020;10: 754.
- 972 14. Liao H-L, Bonito G, Alejandro Rojas J, Hameed K, Wu S, Schadt CW, et al. Fungal  
973 endophytes of *Populus trichocarpa* alter host phenotype, gene expression and rhizobiome  
974 composition. *Molecular Plant-Microbe Interactions*. 2019. doi:10.1094/mpmi-05-18-0133-r
- 975 15. Ozimek E, Jaroszuk-Ścisiel J, Bohacz J, Kornilłowicz-Kowalska T, Tyśkiewicz R, Słomka A,



- 976 et al. Synthesis of Indoleacetic Acid, Gibberellic Acid and ACC-Deaminase by *Mortierella*  
977 Strains Promote Winter Wheat Seedlings Growth under Different Conditions. *Int J Mol Sci.*  
978 2018;19. doi:10.3390/ijms19103218
- 979 16. Desirò A, Hao Z, Liber JA, Benucci GMN, Lowry D, Roberson R, et al. Mycoplasma-related  
980 endobacteria within *Mortierellomycotina* fungi: diversity, distribution and functional insights  
981 into their lifestyle. *ISME J.* 2018;12: 1743–1757.
- 982 17. Uehling J, Gryganskyi A, Hameed K, Tschaplinski T, Misztal PK, Wu S, et al. Comparative  
983 genomics of *Mortierella elongata* and its bacterial endosymbiont *Mycoavidus*  
984 *cysteinexigens*. *Environ Microbiol.* 2017;19: 2964–2983.
- 985 18. Ohshima S, Sato Y, Fujimura R, Takashima Y, Hamada M, Nishizawa T, et al. *Mycoavidus*  
986 *cysteinexigens* gen. nov., sp. nov., an endohyphal bacterium isolated from a soil isolate of  
987 the fungus *Mortierella elongata*. *Int J Syst Evol Microbiol.* 2016;66: 2052–2057.
- 988 19. Okrasinska A, Bokus A, Duk K, Gęsiorska A, Sokołowska B, Miłobędzka A, et al. New  
989 Endohyphal Relationships between Mucoromycota and Burkholderiaceae Representatives.  
990 *Appl Environ Microbiol.* 2021;87. Available: [https://www.researchgate.net/profile/Alicja-  
991 Okrasinska/publication/348762415\\_New\\_endosymbiotic\\_relationships\\_between\\_Mucorom  
992 ycota\\_and\\_Burkholderiaceae\\_representatives/links/604b60a6a6fdcc4d3e5a05bd/New-  
993 endosymbiotic-relationships-between-Mucoromycota-and-Burkholderiaceae-  
994 representatives.pdf](https://www.researchgate.net/profile/Alicja-Okrasinska/publication/348762415_New_endosymbiotic_relationships_between_Mucoromycota_and_Burkholderiaceae_representatives/links/604b60a6a6fdcc4d3e5a05bd/New-endosymbiotic-relationships-between-Mucoromycota-and-Burkholderiaceae-representatives.pdf)
- 995 20. Takashima Y, Seto K, Degawa Y, Guo Y, Nishizawa T, Ohta H, et al. Prevalence and Intra-  
996 Family Phylogenetic Divergence of *Burkholderiaceae*-Related Endobacteria Associated  
997 with Species of *Mortierella*. *Microbes and Environments.* 2018. pp. 417–427.  
998 doi:10.1264/jsme2.me18081
- 999 21. Salvioli A, Ghignone S, Novero M, Navazio L, Venice F, Bagnaresi P, et al. Symbiosis with  
1000 an endobacterium increases the fitness of a mycorrhizal fungus, raising its bioenergetic  
1001 potential. *ISME J.* 2016;10: 130–144.
- 1002 22. Bonfante P, Desirò A. Who lives in a fungus? The diversity, origins and functions of fungal  
1003 endobacteria living in Mucoromycota. *ISME J.* 2017. doi:10.1038/ismej.2017.21
- 1004 23. Doyle J. DNA protocols for plants--CTAB total DNA isolation. In “Molecular techniques in

- 1005 taxonomy".(Eds GM Hewitt, A Johnston) pp. 283--293. Springer: Berlin; 1991.
- 1006 24. Ahlmann-Eltze C. Ggsignif: significance brackets for "ggplot2." R package version 040.  
1007 2019.
- 1008 25. Kassambara A. ggcorrplot: Visualization of a correlation matrix using "ggplot2". R package  
1009 version 0.1. 3. 2019.
- 1010 26. R Development Core Team R. R: A Language and Environment for Statistical Computing.  
1011 R Foundation for Statistical Computing; 2011. doi:10.1007/978-3-540-74686-7
- 1012 27. Bates D, Mächler M, Bolker B, Walker S. Fitting Linear Mixed-Effects Models Using lme4.  
1013 Journal of Statistical Software. 2015. doi:10.18637/jss.v067.i01
- 1014 28. Kuznetsova A, Brockhoff PB, Christensen RHB. lmerTest package: tests in linear mixed  
1015 effects models. J Stat Softw. 2017;82: 1–26.
- 1016 29. Fox J, Weisberg S, Price B, Adler D, Bates D, Baud-Bovy G, et al. car: Companion to  
1017 Applied Regression. R package version 3.0-2. Website: [https://cran.r-project](https://cran.r-project.org/web/packages/car/index.html)  
1018 [org/web/packages/car/index.html](https://cran.r-project.org/web/packages/car/index.html) [accessed 01 June 2019]. 2019.
- 1019 30. Wickham H, Averick M, Bryan J, Chang W, McGowan L, François R, et al. Welcome to the  
1020 Tidyverse. Journal of Open Source Software. 2019. p. 1686. doi:10.21105/joss.01686
- 1021 31. Kruskal WH, Wallis WA. Use of Ranks in One-Criterion Variance Analysis. J Am Stat  
1022 Assoc. 1952;47: 583–621.
- 1023 32. Lenth R. emmeans: Estimated marginal means, aka least-squares means (Version 1.5. 2-  
1024 1)[R package]. 2020.
- 1025 33. Schneider CA, Rasband WS, Eliceiri KW. NIH Image to ImageJ: 25 years of image  
1026 analysis. Nat Methods. 2012;9: 671–675.
- 1027 34. Fedorov A, Beichel R, Kalpathy-Cramer J, Finet J, Fillion-Robin J-C, Pujol S, et al. 3D  
1028 Slicer as an image computing platform for the Quantitative Imaging Network. Magn Reson  
1029 Imaging. 2012;30: 1323–1341.
- 1030 35. Bolger AM, Lohse M, Usadel B. Trimmomatic: a flexible trimmer for Illumina sequence data.  
1031 Bioinformatics. 2014;30: 2114–2120.

- 1032 36. Patro R, Duggal G, Love MI, Irizarry RA, Kingsford C. Salmon provides fast and bias-aware  
1033 quantification of transcript expression. *Nat Methods*. 2017;14: 417–419.
- 1034 37. Zhang R, Calixto CPG, Marquez Y, Venhuizen P, Tzioutziou NA, Guo W, et al. AtRTD2: A  
1035 Reference Transcript Dataset for accurate quantification of alternative splicing and  
1036 expression changes in *Arabidopsis thaliana* RNA-seq data. *bioRxiv*. 2016. p. 051938.  
1037 doi:10.1101/051938
- 1038 38. Robinson MD, McCarthy DJ, Smyth GK. edgeR: a Bioconductor package for differential  
1039 expression analysis of digital gene expression data. *Bioinformatics*. 2010;26: 139–140.
- 1040 39. McCarthy DJ, Chen Y, Smyth GK. Differential expression analysis of multifactor RNA-Seq  
1041 experiments with respect to biological variation. *Nucleic Acids Res*. 2012;40: 4288–4297.
- 1042 40. Love MI, Huber W, Anders S. Moderated estimation of fold change and dispersion for RNA-  
1043 seq data with DESeq2. *Genome Biol*. 2014;15: 550.
- 1044 41. Blighe K, Rana S, Lewis M. EnhancedVolcano: Publication-ready volcano plots with  
1045 enhanced colouring and labeling. R package version. 2019;1.
- 1046 42. Berardini TZ, Reiser L, Li D, Mezheritsky Y, Muller R, Strait E, et al. The *Arabidopsis*  
1047 information resource: Making and mining the “gold standard” annotated reference plant  
1048 genome. *Genesis*. 2015;53: 474–485.
- 1049 43. UniProt Consortium. UniProt: a worldwide hub of protein knowledge. *Nucleic Acids Res*.  
1050 2019;47: D506–D515.
- 1051 44. Wu T, Hu E, Xu S, Chen M, Guo P, Dai Z, et al. clusterProfiler 4.0: A universal enrichment  
1052 tool for interpreting omics data. *Innovation (N Y)*. 2021;2: 100141.
- 1053 45. Becker LE, Cubeta MA. Increased Flower Production of *Calibrachoa x hybrida* by the Soil  
1054 Fungus *Mortierella elongata*. *J Environ Hortic*. 2020;38: 114–119.
- 1055 46. Abendroth LJ, Myers AJW, Elmore RW. Corn planting date: Understanding plant growth  
1056 and yield response. *Proceedings of the Integrated Crop Management Conference*. 2009.  
1057 doi:10.31274/icm-180809-1
- 1058 47. Sadras VO. Evolutionary aspects of the trade-off between seed size and number in crops.  
1059 *Field Crops Res*. 2007;100: 125–138.

- 1060 48. Breen AN, Richards JH. Irrigation and fertilization effects on seed number, size,  
1061 germination and seedling growth: implications for desert shrub establishment. *Oecologia*.  
1062 2008;157: 13–19.
- 1063 49. Genre A, Bonfante P. Building a mycorrhizal cell: How to reach compatibility between  
1064 plants and arbuscular mycorrhizal fungi. *Journal of Plant Interactions*. 2005. pp. 3–13.  
1065 doi:10.1080/17429140500318986
- 1066 50. Deshmukh S, Hückelhoven R, Schäfer P, Imani J, Sharma M, Weiss M, et al. The root  
1067 endophytic fungus *Piriformospora indica* requires host cell death for proliferation during  
1068 mutualistic symbiosis with barley. *Proc Natl Acad Sci U S A*. 2006;103: 18450–18457.
- 1069 51. Brundrett M. Diversity and classification of mycorrhizal associations. *Biol Rev Camb Philos*  
1070 *Soc*. 2004;79: 473–495.
- 1071 52. Valério L, De Meyer M, Penel C, Dunand C. Expression analysis of the *Arabidopsis*  
1072 peroxidase multigenic family. *Phytochemistry*. 2004;65: 1331–1342.
- 1073 53. Hiraga S, Sasaki K, Ito H, Ohashi Y, Matsui H. A large family of class III plant peroxidases.  
1074 *Plant Cell Physiol*. 2001;42: 462–468.
- 1075 54. Kwon T, Sparks JA, Nakashima J, Allen SN, Tang Y, Blancaflor EB. Transcriptional  
1076 response of *Arabidopsis* seedlings during spaceflight reveals peroxidase and cell wall  
1077 remodeling genes associated with root hair development. *Am J Bot*. 2015;102: 21–35.
- 1078 55. Chanclud E, Morel J-B. Plant hormones: a fungal point of view. *Mol Plant Pathol*. 2016;17:  
1079 1289–1297.
- 1080 56. Foo E, McAdam EL, Weller JL, Reid JB. Interactions between ethylene, gibberellins, and  
1081 brassinosteroids in the development of rhizobial and mycorrhizal symbioses of pea. *J Exp*  
1082 *Bot*. 2016;67: 2413–2424.
- 1083 57. Splivallo R, Fischer U, Göbel C, Feussner I, Karlovsky P. Truffles regulate plant root  
1084 morphogenesis via the production of auxin and ethylene. *Plant Physiol*. 2009;150: 2018–  
1085 2029.
- 1086 58. Meents AK, Furch ACU, Almeida-Trapp M, Özyürek S, Scholz SS, Kirbis A, et al. Beneficial  
1087 and Pathogenic *Arabidopsis* Root-Interacting Fungi Differently Affect Auxin Levels and

- 1088 Responsive Genes During Early Infection. *Frontiers in Microbiology*. 2019.  
1089 doi:10.3389/fmicb.2019.00380
- 1090 59. Vahabi K, Sherameti I, Bakshi M, Mrozinska A, Ludwig A, Reichelt M, et al. The interaction  
1091 of *Arabidopsis* with *Piriformospora indica* shifts from initial transient stress induced by  
1092 fungus-released chemical mediators to a mutualistic interaction after physical contact of the  
1093 two symbionts. *BMC Plant Biol*. 2015;15: 58.
- 1094 60. Xia N, Zhang G, Liu X-Y, Deng L, Cai G-L, Zhang Y, et al. Characterization of a novel  
1095 wheat NAC transcription factor gene involved in defense response against stripe rust  
1096 pathogen infection and abiotic stresses. *Mol Biol Rep*. 2010;37: 3703–3712.
- 1097 61. Qi J, Li J, Han X, Li R, Wu J, Yu H, et al. Jasmonic acid carboxyl methyltransferase  
1098 regulates development and herbivory-induced defense response in rice. *J Integr Plant Biol*.  
1099 2016;58: 564–576.
- 1100 62. Salehin M, Bagchi R, Estelle M. SCFTIR1/AFB-based auxin perception: mechanism and  
1101 role in plant growth and development. *Plant Cell*. 2015;27: 9–19.
- 1102 63. Field B, Osbourn AE. Metabolic Diversification—Independent Assembly of Operon-Like  
1103 Gene Clusters in Different Plants. *Science*. 2008 [cited 10 Nov 2021].  
1104 doi:10.1126/science.1154990
- 1105 64. Field B, Fiston-Lavier A-S, Kemen A, Geisler K, Quesneville H, Osbourn AE. Formation of  
1106 plant metabolic gene clusters within dynamic chromosomal regions. *Proc Natl Acad Sci U S*  
1107 *A*. 2011;108: 16116–16121.
- 1108 65. Go YS, Lee SB, Kim HJ, Kim J, Park H-Y, Kim J-K, et al. Identification of marneral  
1109 synthase, which is critical for growth and development in *Arabidopsis*. *Plant J*. 2012;72:  
1110 791–804.
- 1111 66. Johnson EE. A profile of the expression of a metabolic gene cluster in *Arabidopsis*.  
1112 University of British Columbia; 2012. doi:10.14288/1.0072908
- 1113 67. Broekaert WF, Delauré SL, De Bolle MFC, Cammue BPA. The role of ethylene in host-  
1114 pathogen interactions. *Annu Rev Phytopathol*. 2006;44: 393–416.
- 1115 68. Zhang H, Wu X, Li G, Qin P. Interactions between arbuscular mycorrhizal fungi and

- 1116 phosphate-solubilizing fungus (*Mortierella* sp.) and their effects on *Kosteletzkya virginica*  
1117 growth and enzyme activities of rhizosphere and bulk soils at different salinities. *Biol Fertil*  
1118 *Soils*. 2011;47: 543–554.
- 1119 69. Nath M, Bhatt D, Prasad R, Tuteja N. Reactive Oxygen Species (ROS) Metabolism and  
1120 Signaling in Plant-Mycorrhizal Association Under Biotic and Abiotic Stress Conditions. In:  
1121 Varma A, Prasad R, Tuteja N, editors. *Mycorrhiza - Eco-Physiology, Secondary*  
1122 *Metabolites, Nanomaterials*. Cham: Springer International Publishing; 2017. pp. 223–232.
- 1123 70. Nishizawa A, Yabuta Y, Shigeoka S. Galactinol and raffinose constitute a novel function to  
1124 protect plants from oxidative damage. *Plant Physiol*. 2008;147: 1251–1263.
- 1125 71. Tognetti VB, Mühlenbock P, Van Breusegem F. Stress homeostasis - the redox and auxin  
1126 perspective. *Plant Cell Environ*. 2012;35: 321–333.
- 1127 72. Tognetti VB, Van Aken O, Morreel K, Vandenbroucke K, van de Cotte B, De Clercq I, et al.  
1128 Perturbation of indole-3-butyric acid homeostasis by the UDP-glucosyltransferase  
1129 UGT74E2 modulates *Arabidopsis* architecture and water stress tolerance. *Plant Cell*.  
1130 2010;22: 2660–2679.
- 1131 73. Yuan P, Jauregui E, Du L, Tanaka K, Poovaiah BW. Calcium signatures and signaling  
1132 events orchestrate plant–microbe interactions. *Curr Opin Plant Biol*. 2017;38: 173–183.
- 1133 74. McCormack E, Braam J. Calmodulins and related potential calcium sensors of *Arabidopsis*.  
1134 *New Phytol*. 2003;159: 585–598.
- 1135 75. Cho K-M, Nguyen HTK, Kim SY, Shin JS, Cho DH, Hong SB, et al. CML10, a variant of  
1136 calmodulin, modulates ascorbic acid synthesis. *New Phytol*. 2016;209: 664–678.
- 1137 76. Kazan K, Manners JM. Linking development to defense: auxin in plant–pathogen  
1138 interactions. *Trends Plant Sci*. 2009;14: 373–382.
- 1139 77. Lockhart CL, Forsyth FR, Eaves CA. Effect of ethylene on development of *Gloeosporium*  
1140 *album* in apple and on growth of the fungus in culture. *Can J Plant Sci*. 1968;48: 557–559.
- 1141 78. El-Kazzaz MK. Ethylene effects on in vitro and in vivo growth of certain postharvest fruit-  
1142 infecting fungi. *Phytopathology*. 1983;73: 998.
- 1143 79. Kępczyńska E. Ethylene requirement during germination of *Botrytis cinerea* spores.

- 1144           Physiol Plant. 1989. Available: <https://onlinelibrary.wiley.com/doi/abs/10.1111/j.1399->  
1145           3054.1989.tb05655.x?casa\_token=CrP1o9f2E9wAAAAA:\_yZRlIFQZFXBs89M7po6vo73Dy  
1146           8iWNZ7NLCG\_yACcW2bxlgGLch4fK3tdIS0xbK08ry0vrODnBkcKQw
- 1147   80. Gryndler M, Hršelová H, Chvátalová I, Jansa J. The effect of selected plant hormones on in  
1148       vitro proliferation of hyphae of *Glomus fistulosum*. Biol Plant. 1998;41: 255–263.
- 1149   81. Pozo MJ, López-Ráez JA, Azcón-Aguilar C, García-Garrido JM. Phytohormones as  
1150       integrators of environmental signals in the regulation of mycorrhizal symbioses. New  
1151       Phytol. 2015;205: 1431–1436.
- 1152

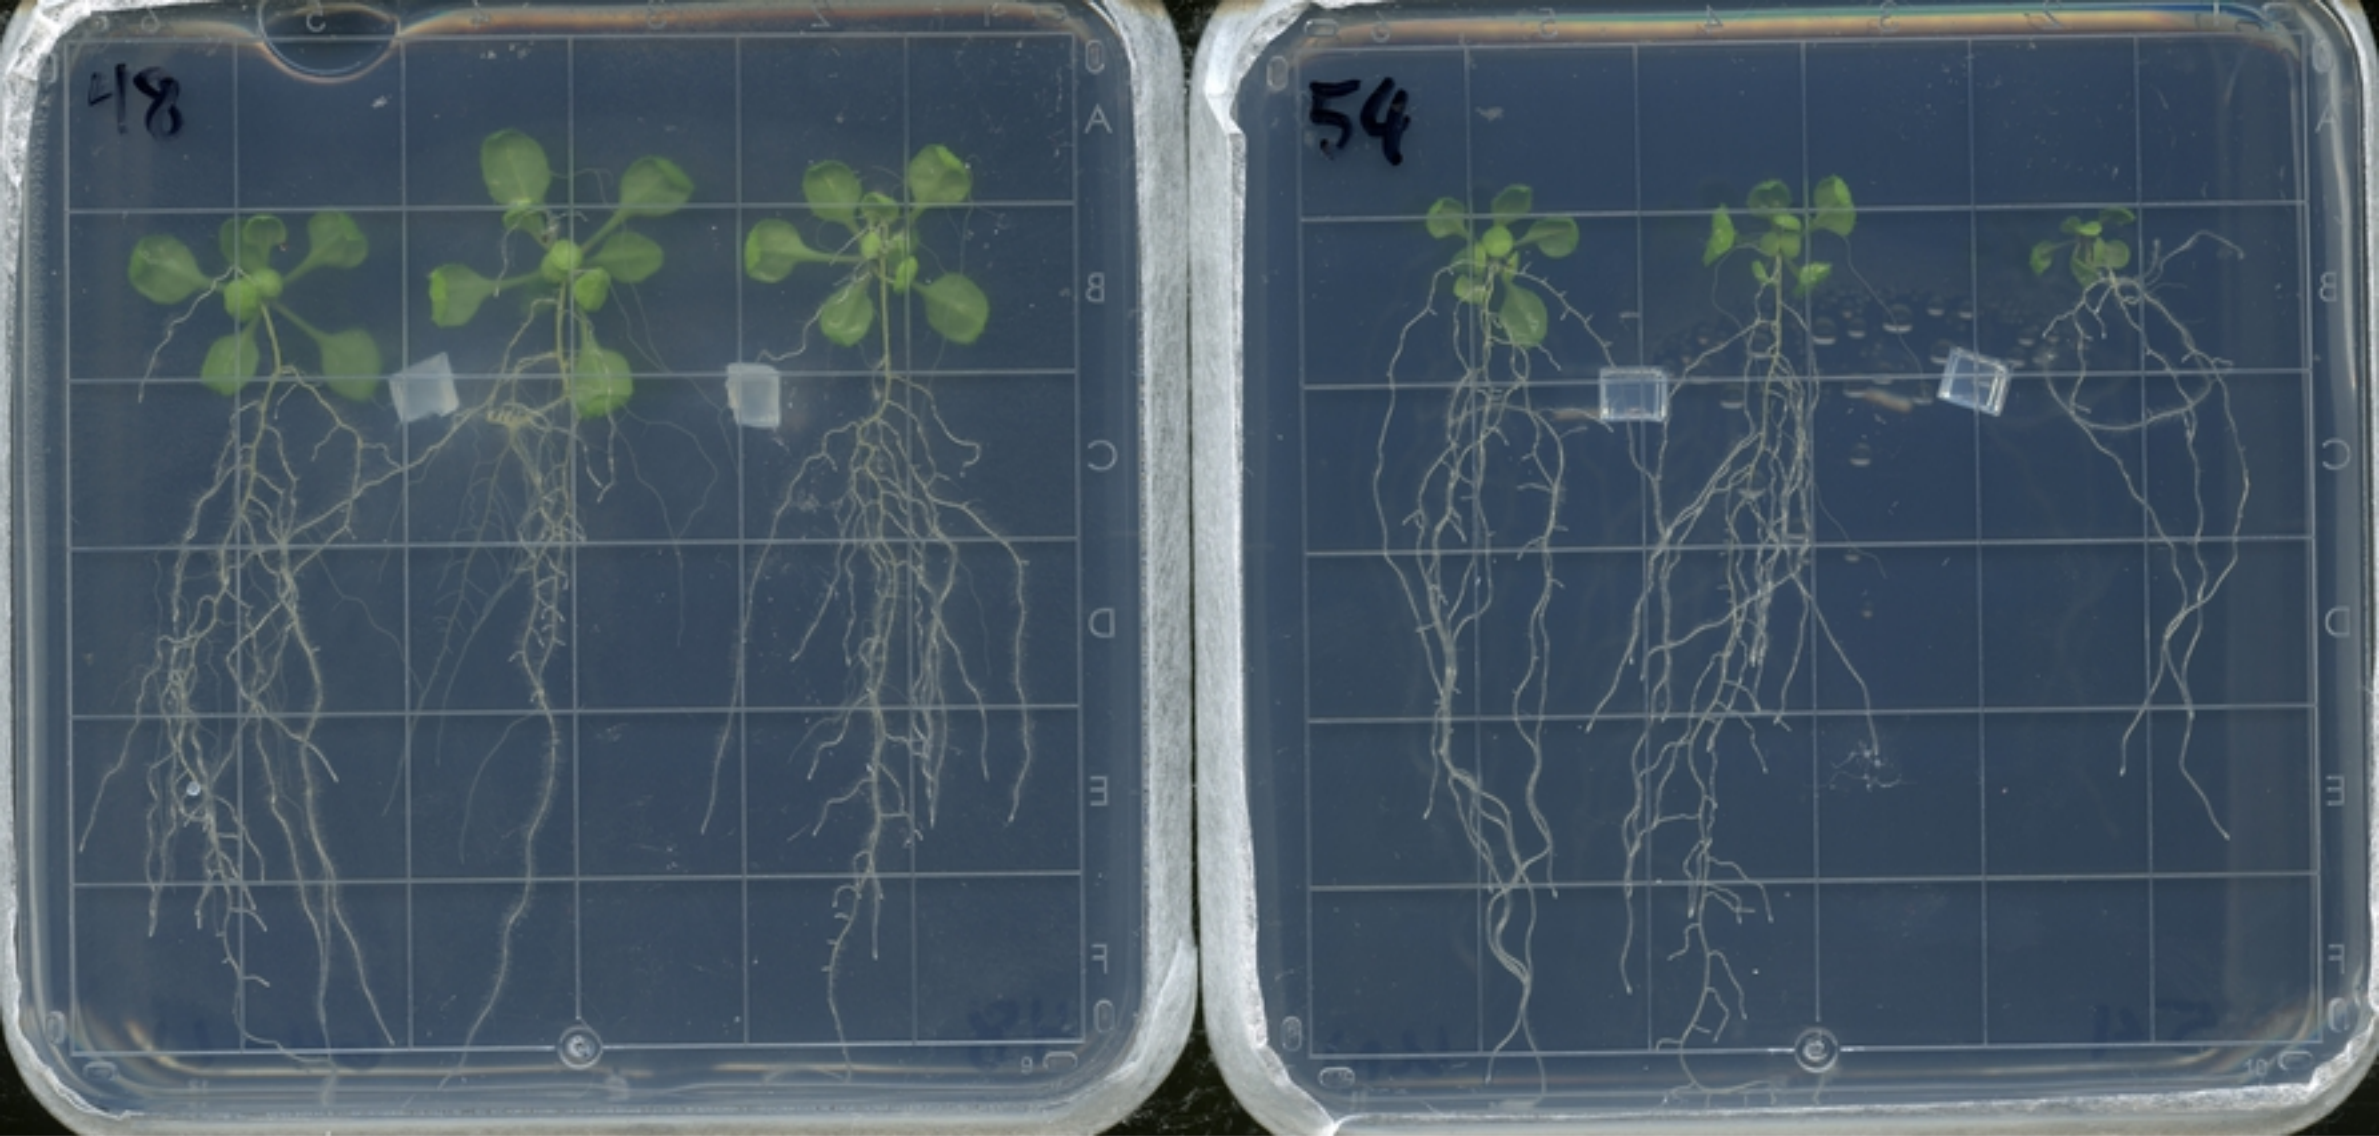

Figure 1



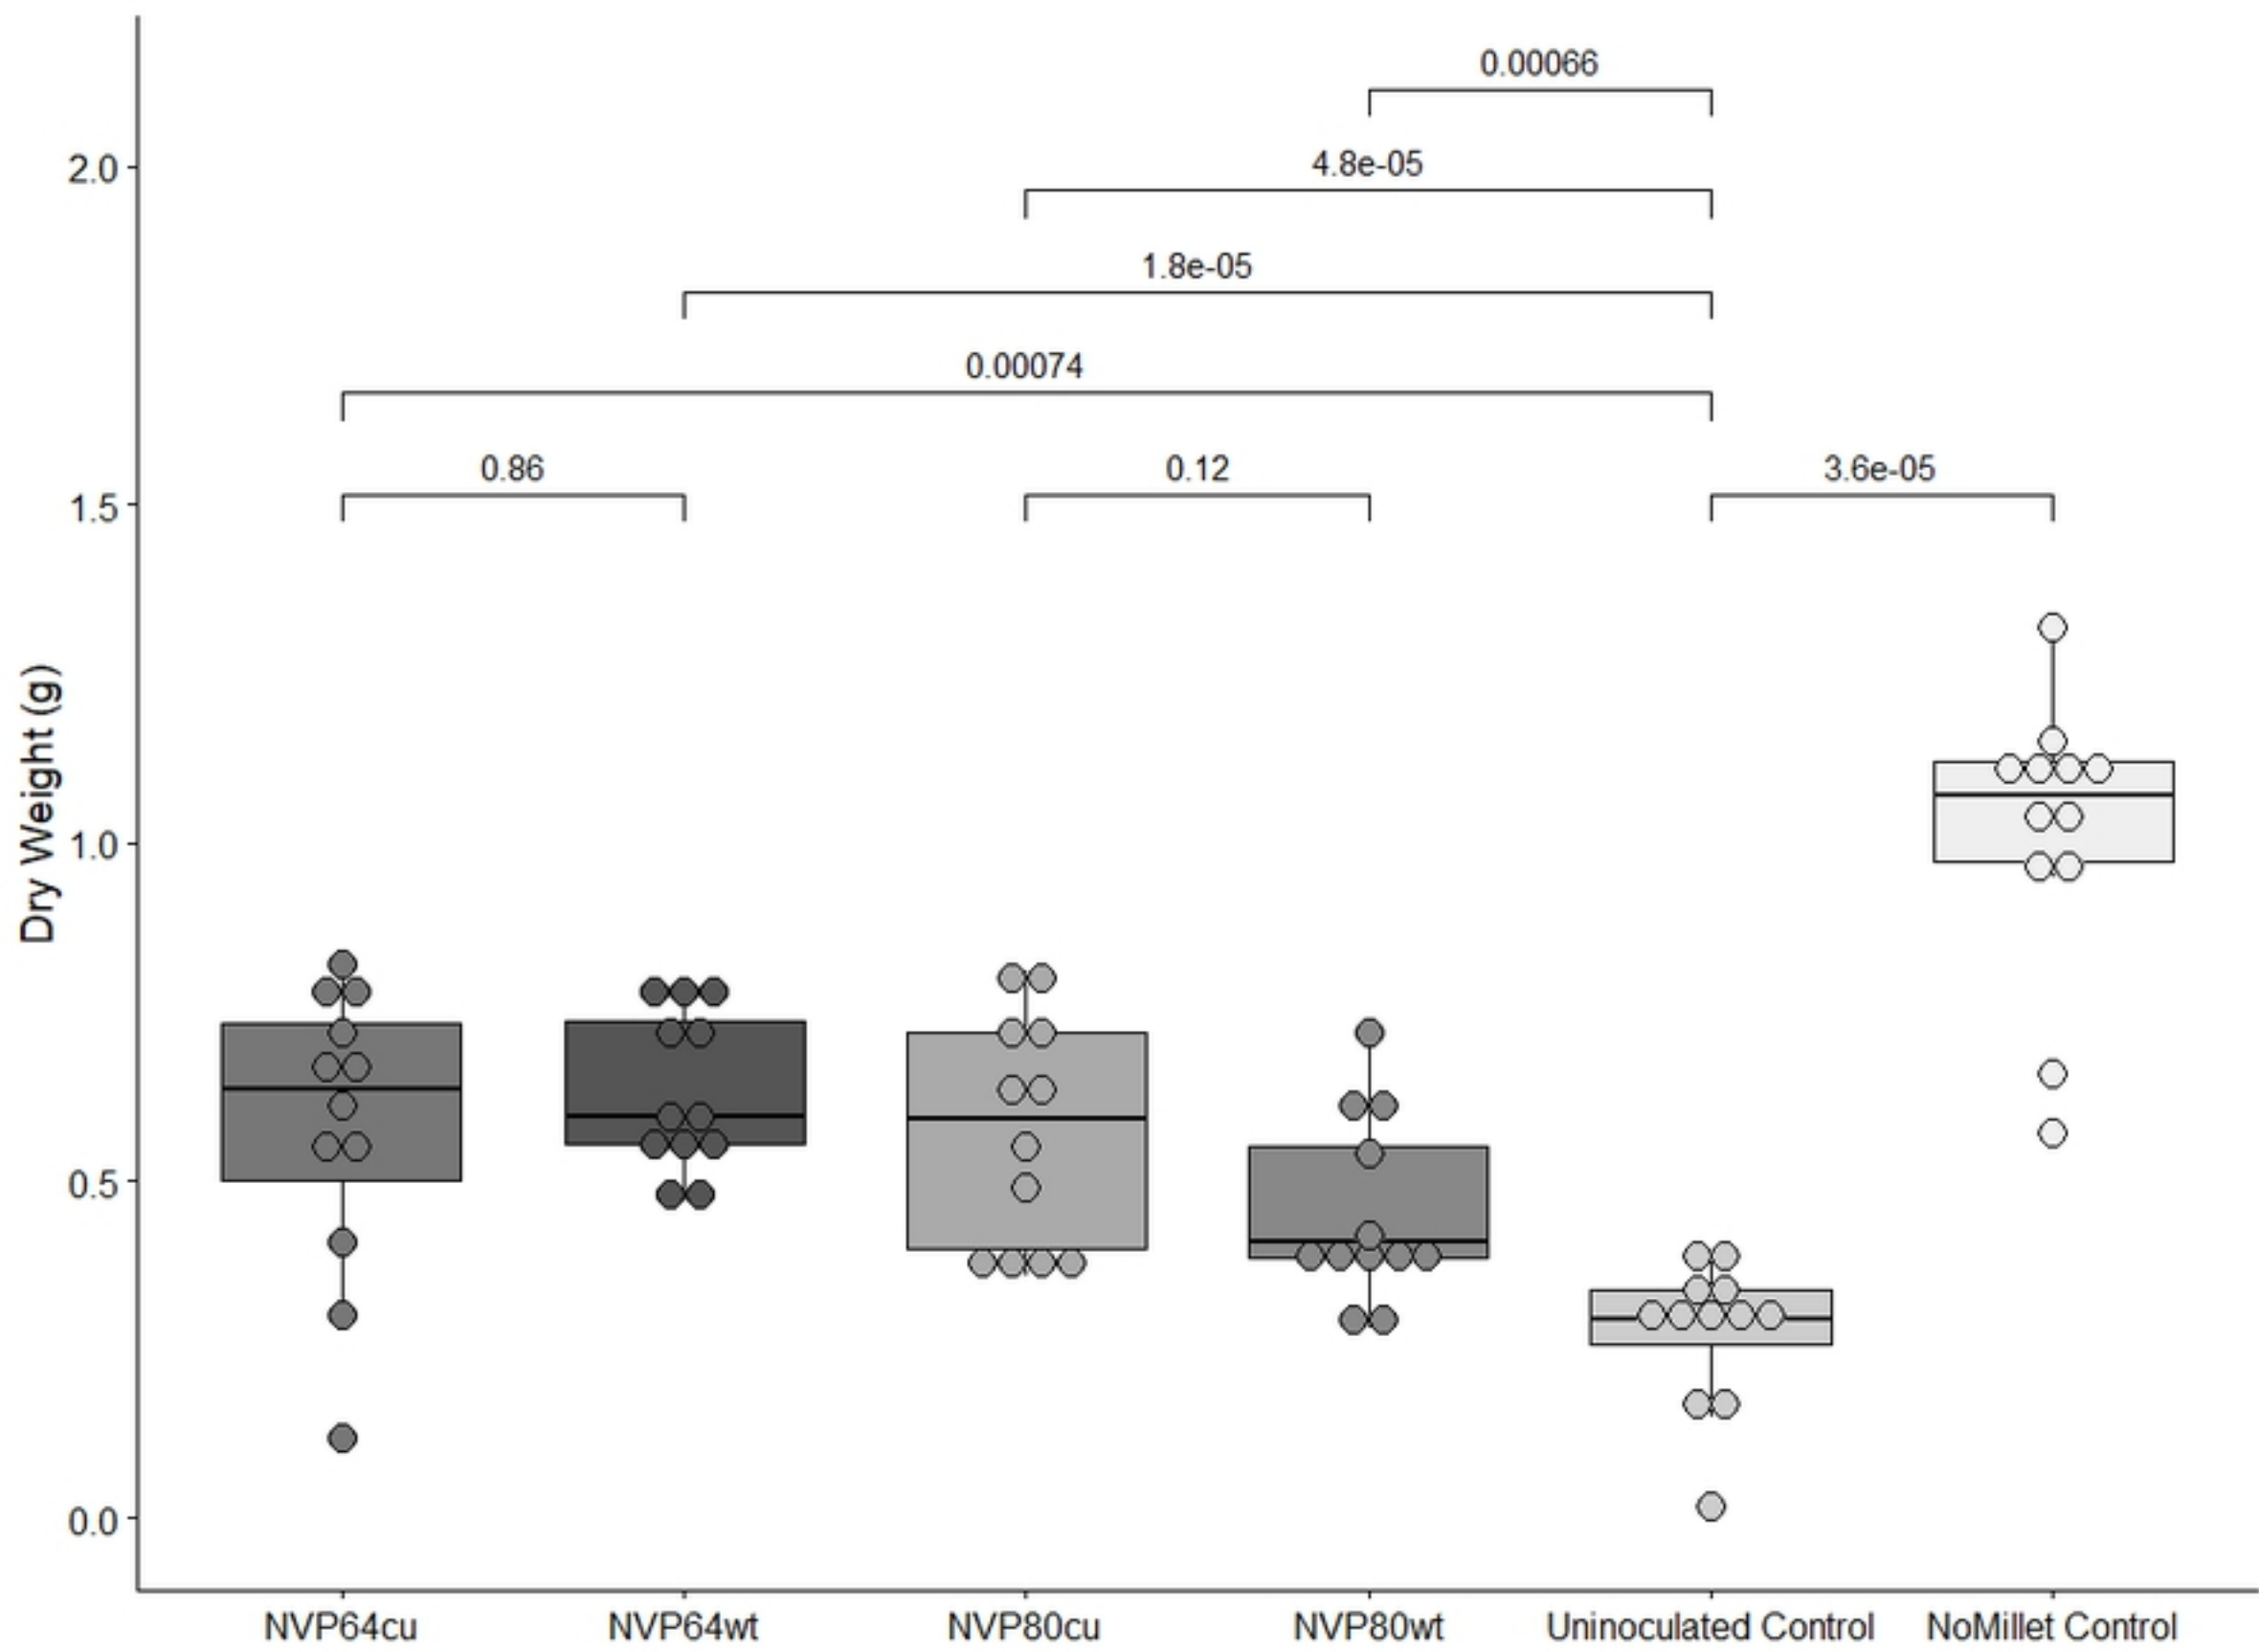

Figure 2

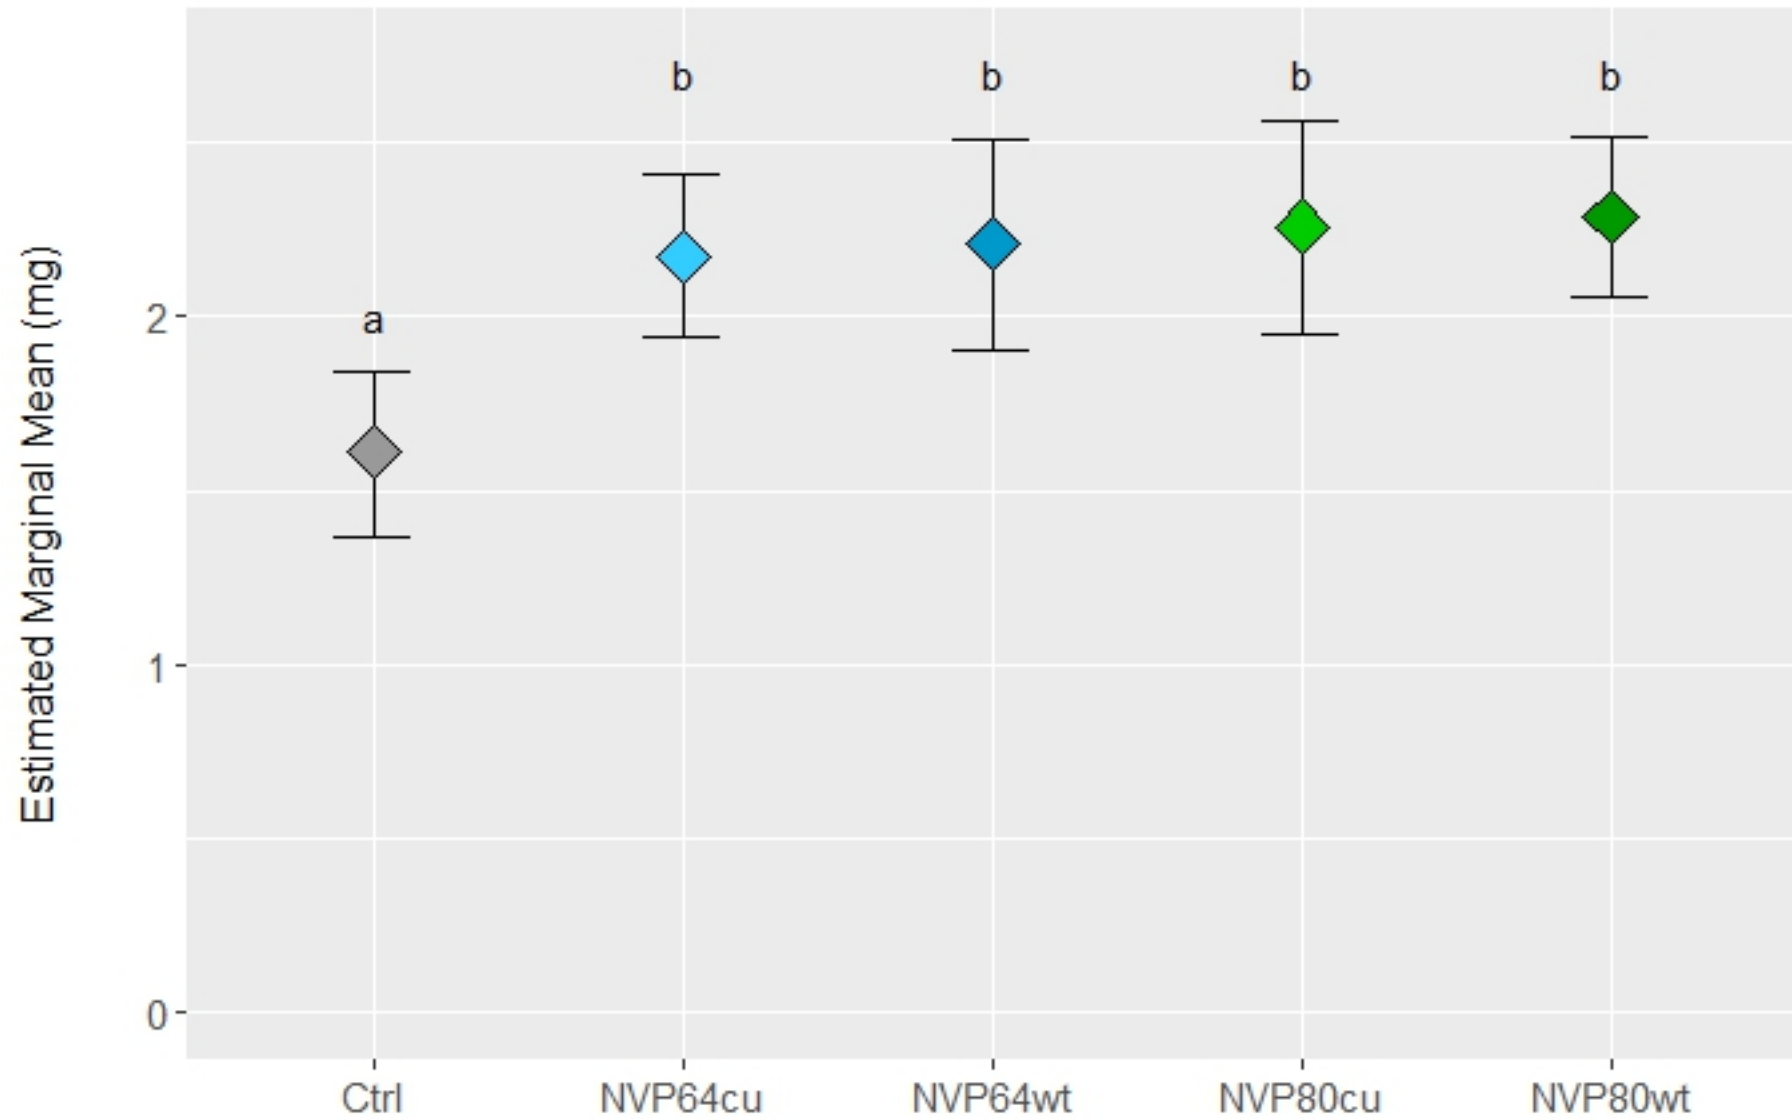

Figure 4

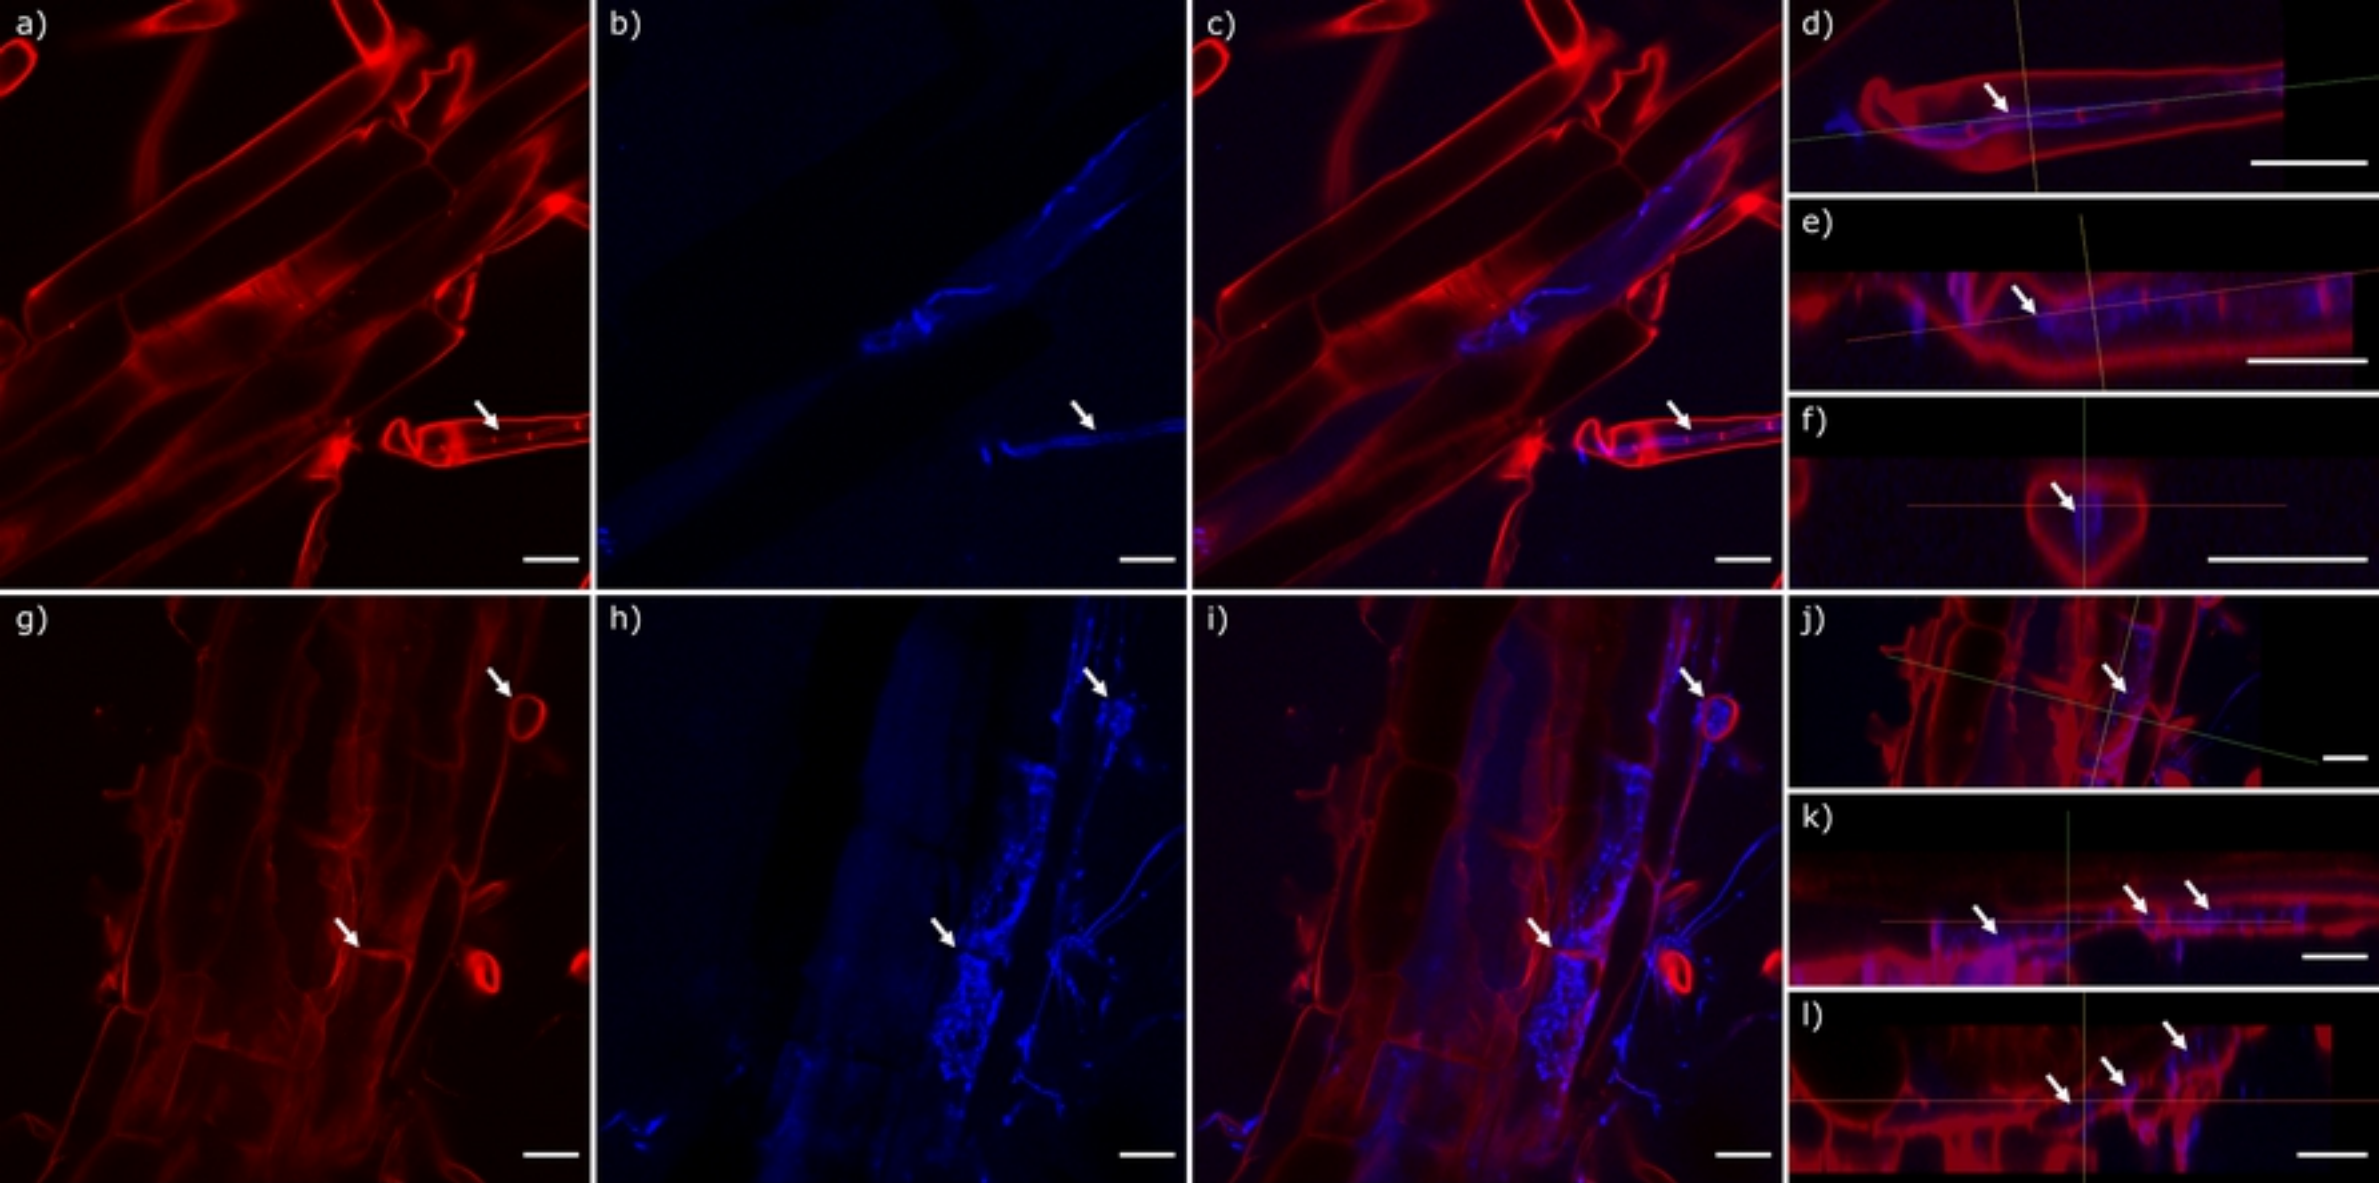

Figure 5

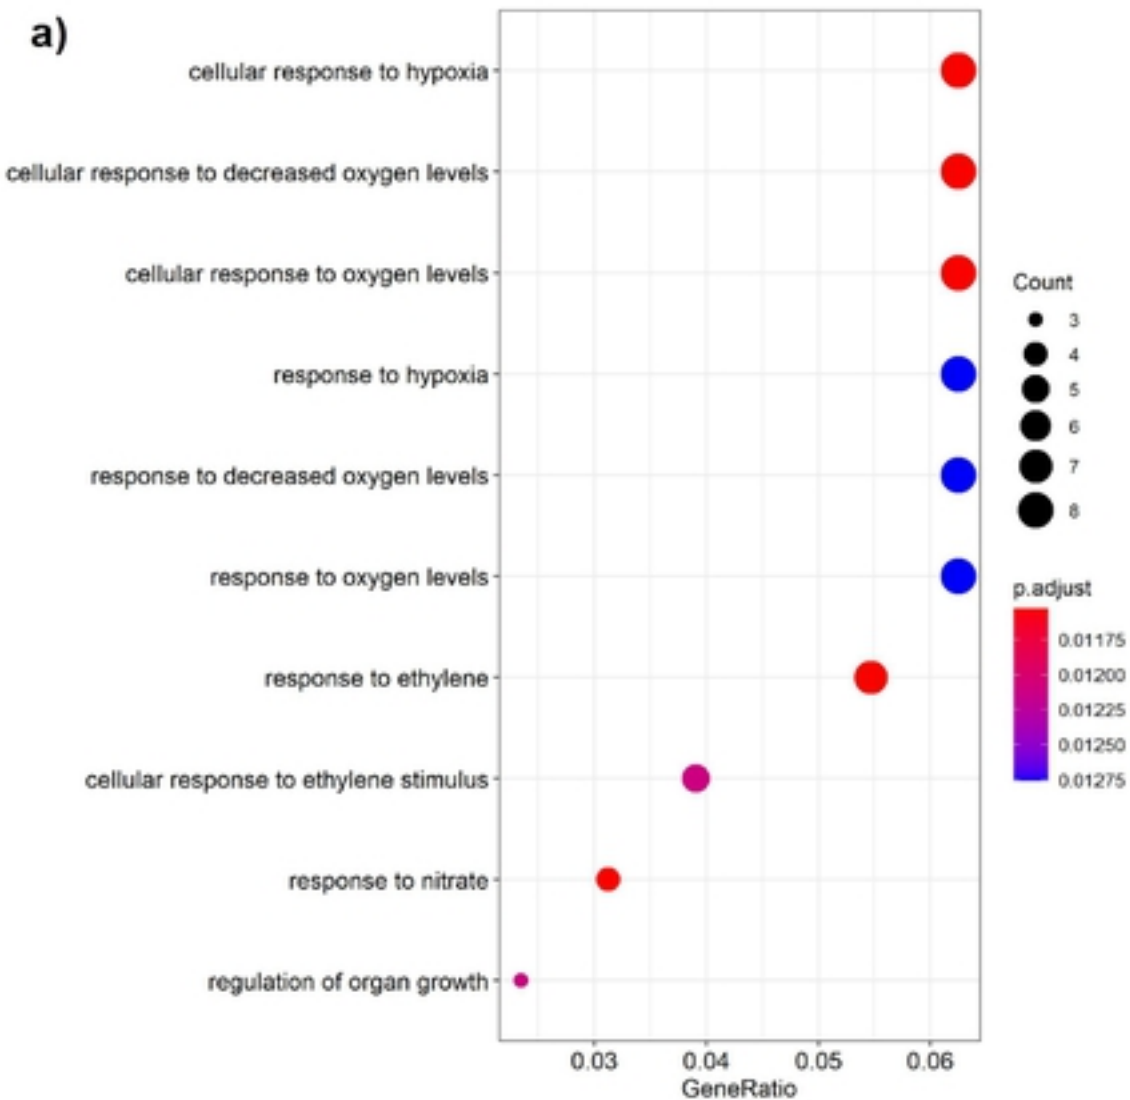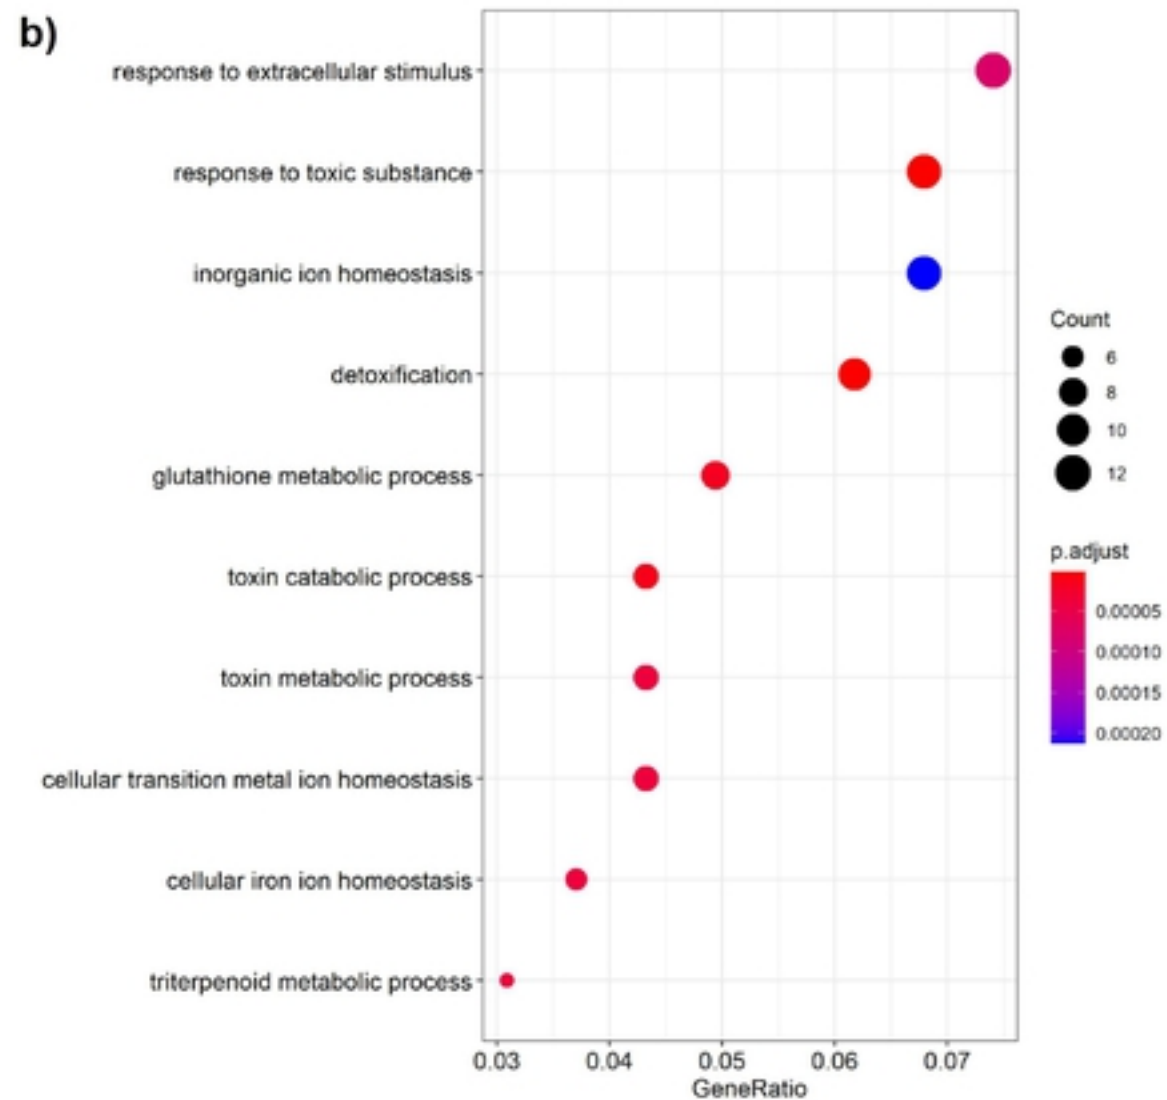

Figure 7

bioRxiv preprint doi: <https://doi.org/10.1101/2021.12.14.472664>; this version posted December 14, 2021. The copyright holder for this preprint (which was not certified by peer review) is the author/funder, who has granted bioRxiv a license to display the preprint in perpetuity. It is made available under aCC-BY 4.0 International license.

| <b>Fixed Effects</b>            |                 |                  |                 |                    |          |
|---------------------------------|-----------------|------------------|-----------------|--------------------|----------|
|                                 | <b>Estimate</b> | <b>Std.Error</b> | <b>df</b>       | <b>t-value</b>     | <b>p</b> |
| <b>(Intercept)</b>              | 0.581           | 0.098            | 8.502           | 5.92               | 2.7E-04  |
| <b>treatment=NVP64cu</b>        | 0.601           | 0.068            | 230.9           | 8.79               | 3E-16    |
| <b>treatment=NVP64wt</b>        | 0.565           | 0.076            | 232.6           | 7.41               | 2E-12    |
| <b>treatment=NVP80cu</b>        | 0.650           | 0.068            | 230.8           | 9.52               | <2E-16   |
| <b>treatment=NVP80wt</b>        | 0.681           | 0.076            | 231.9           | 8.93               | <2E-16   |
| <b>Root Length</b>              | 0.122           | 0.008            | 514.1           | 16.06              | <2E-16   |
| <b>Random effects</b>           |                 |                  |                 |                    |          |
|                                 | <b>Name</b>     | <b>Variance</b>  | <b>Std.Dev.</b> | <b># of Groups</b> |          |
| <b>Plate</b>                    | (Intercept)     | 0.074            | 0.273           | 255                |          |
| <b>Experiment</b>               | (Intercept)     | 0.005            | 0.072           | 2                  |          |
| <b>Residual</b>                 |                 | 0.117            | 0.342           | -                  | -        |
| <b>EMM Pairwise Comparisons</b> |                 |                  |                 |                    |          |
| <b>Contrast</b>                 | <b>estimate</b> | <b>SE</b>        | <b>df</b>       | <b>t.ratio</b>     | <b>p</b> |
| Control - NVP64cu               | -0.6005         | 0.069            | 250             | -8.7               | <.0001   |
| Control - NVP64wt               | -0.5654         | 0.0763           | 249             | -7.41              | <.0001   |
| Control - NVP80cu               | -0.6498         | 0.0689           | 249             | -9.43              | <.0001   |
| Control - NVP80wt               | -0.6807         | 0.0762           | 248             | -8.93              | <.0001   |
| NVP64cu - NVP64wt               | 0.0351          | 0.0689           | 250             | 0.509              | 0.9864   |
| NVP64cu - NVP80cu               | -0.0494         | 0.0573           | 249             | -0.86              | 0.9108   |
| NVP64cu - NVP80wt               | -0.0803         | 0.069            | 250             | -1.16              | 0.7717   |
| NVP64wt - NVP80cu               | -0.0844         | 0.0689           | 250             | -1.23              | 0.7363   |
| NVP64wt - NVP80wt               | -0.1153         | 0.0763           | 249             | -1.51              | 0.5555   |
| NVP80cu - NVP80wt               | -0.0309         | 0.0689           | 249             | -0.45              | 0.9916   |

Table 1

| Functional Annotation    |                              |                                                                                                         | Log2 Fold-Change |       |       |       | Name      | Gene      |
|--------------------------|------------------------------|---------------------------------------------------------------------------------------------------------|------------------|-------|-------|-------|-----------|-----------|
| Broad                    | Middle                       | Detail                                                                                                  | NVP              | NVP   | NVP   | NVP   |           |           |
| Abiotic Stress           | Hypoxia/<br>Oxidative Stress | Peroxidase superfamily protein                                                                          | 2.26             | 1.92  | 1.84  | 1.98  | PER28     | AT3G03670 |
|                          |                              | Stachyose synthase, Raffinose synthase 4                                                                | 1.72             | 0.93  | 1.31  | 1.54  | STS       | AT4G01970 |
| Defense                  | Bacteria                     | Leucine-rich receptor-like protein kinase family protein                                                | 1.5              |       | 0.94  | 1.18  | FLS2      | AT5G46330 |
|                          |                              | Calcium-binding EF hand family protein                                                                  | 1.38             | 1.57  | 1.78  | 1.63  | CML12     | AT2G41100 |
|                          | Fungus                       | Chitinase family protein                                                                                | 3.02             |       | 1.98  | 2.36  | F18O19.27 | AT2G43620 |
|                          |                              | homolog of RPW8 3                                                                                       | 1.08             |       | 1.1   | 1.04  | HR3       | AT3G50470 |
|                          |                              | SBP (S-ribonuclease binding protein) family protein                                                     | -4.15            | -3.1  | -3.2  | -3.49 | dl4875c   | AT4G17680 |
|                          |                              | CRP (Cysteine-rich secretory proteins, Antigen 3, & Pathogenesis-related 1 protein) superfamily protein | 2.77             | 2.17  | 3.08  | 2.63  | CAPE3     | AT4G33720 |
| Development              | Growth                       | promotes cell growth in response to light                                                               | 0.96             | 0.7   | 1.16  | 0.77  | LSH10     | AT2G42610 |
|                          |                              | xanthine dehydrogenase 2                                                                                | 0.82             | 1     | 0.91  | 0.75  | XDH2      | AT4G34900 |
|                          | Root                         | thalianol hydroxylase cytochrome P450, family 700, subfamily A, polypeptide 2                           | -1.16            |       |       | -1.19 | THAH      | AT5G48000 |
|                          |                              | Thalianol synthase 1                                                                                    | -1.93            |       |       | -1.71 | THAS      | AT5G48010 |
|                          |                              | marneral oxidase                                                                                        | -0.76            | -1.05 | -0.87 | -0.92 | MRO       | AT5G42590 |
|                          |                              | Thalianol desaturase cytochrome P450, family 705, subfamily A, polypeptide 5                            | -1.65            | -1.38 | -1.42 | -1.64 | THAD1     | AT5G47990 |
| Hormone Signaling        | Auxin                        | Nitrilase 1                                                                                             | -0.77            |       |       | -0.78 | NIT1      | AT3G44310 |
|                          |                              | nitrilase 2                                                                                             | -1.05            |       | -0.8  | -0.87 | NIT2      | AT3G44300 |
|                          | Brassinosteroid              | squalene monooxygenase 2                                                                                | -1.8             | -1.76 |       | -2.13 | SQE4      | AT5G24140 |
|                          |                              | baruol synthase 1                                                                                       | 3.8              |       | 2.74  | 3.44  | BARS1     | AT4G15370 |
|                          | Eth/JA                       | ethylene response factor                                                                                | 0.74             | 0.76  | 0.69  | 0.8   | ERF59     | AT1G06160 |
|                          |                              | Integrase-type DNA-binding superfamily protein                                                          | 1.94             |       |       | 2.04  | TDR1      | AT3G23230 |
|                          |                              | ethylene-activated signaling pathway                                                                    | 1.49             |       |       | 1.44  | RAP2.9    | AT4G06746 |
|                          |                              | ETHYLENE RESPONSE 2                                                                                     | 0.84             |       | 0.79  | 0.84  | ERT2      | AT3G23150 |
|                          |                              | 1-amino-cyclopropane-1-carboxylate (ACC) synthase 7                                                     | -1.01            | -0.99 | -0.85 | -1.08 | ACS7      | AT4G26200 |
|                          | Signaling                    | cell wall-associated kinase                                                                             |                  | 2.86  | 3.14  |       | WAK1      | AT1G21250 |
| wall-associated kinase 2 |                              | 1.41                                                                                                    | 1.11             | 1.53  | 1.16  | WAK2  | AT1G21270 |           |

Table 2

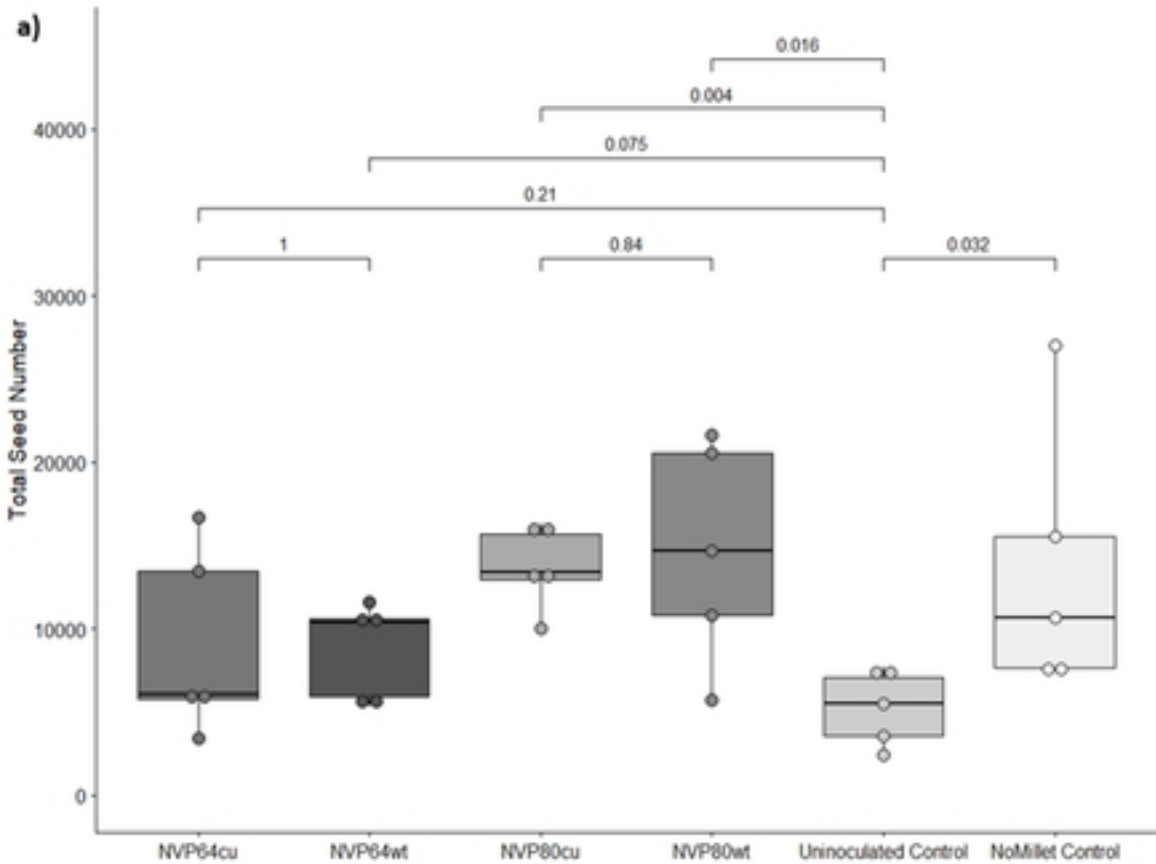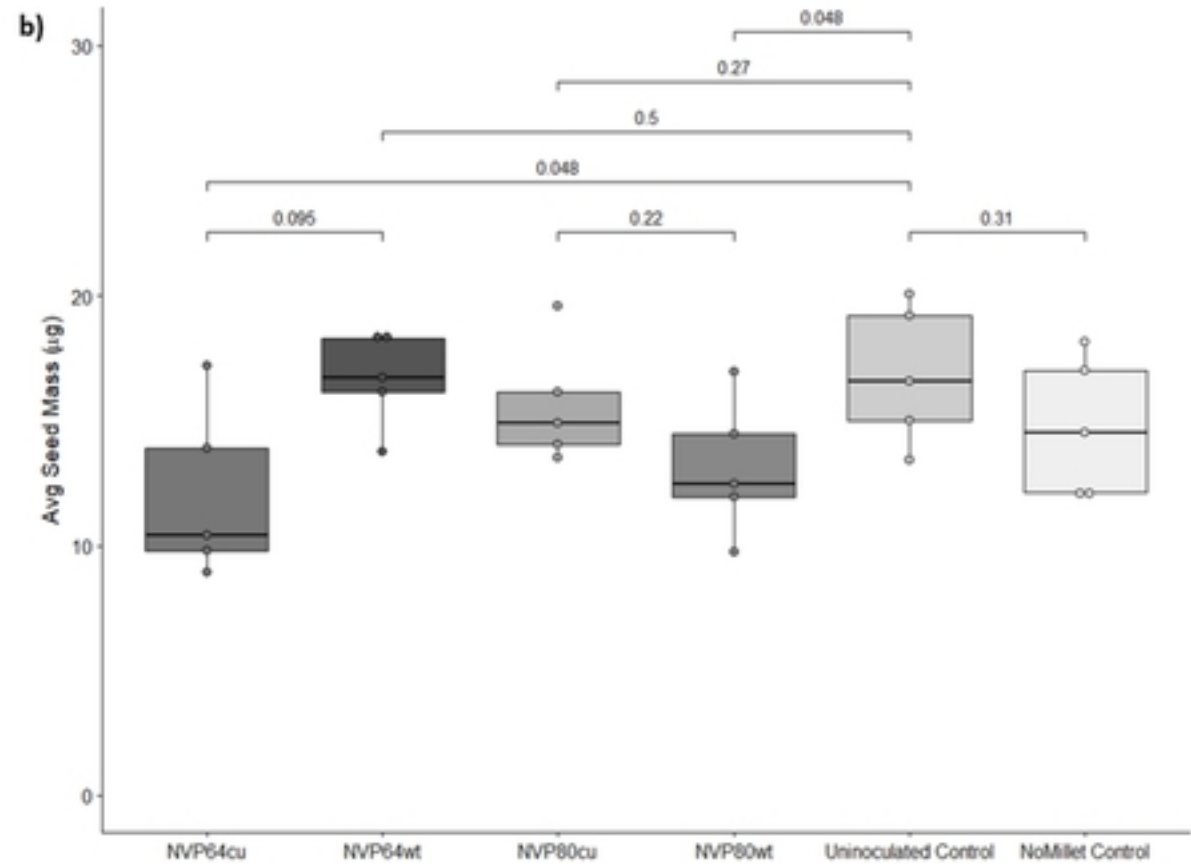

Figure 3

a)

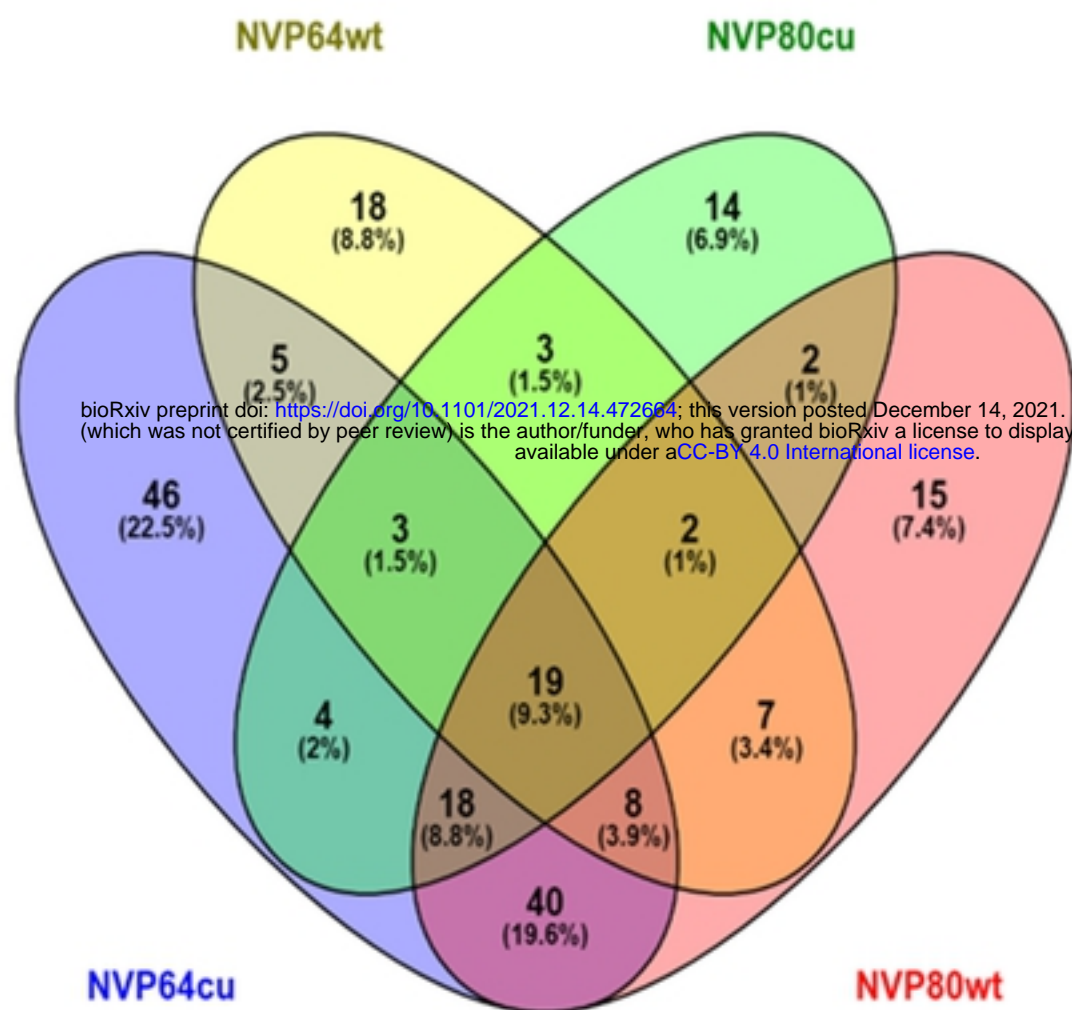

b)

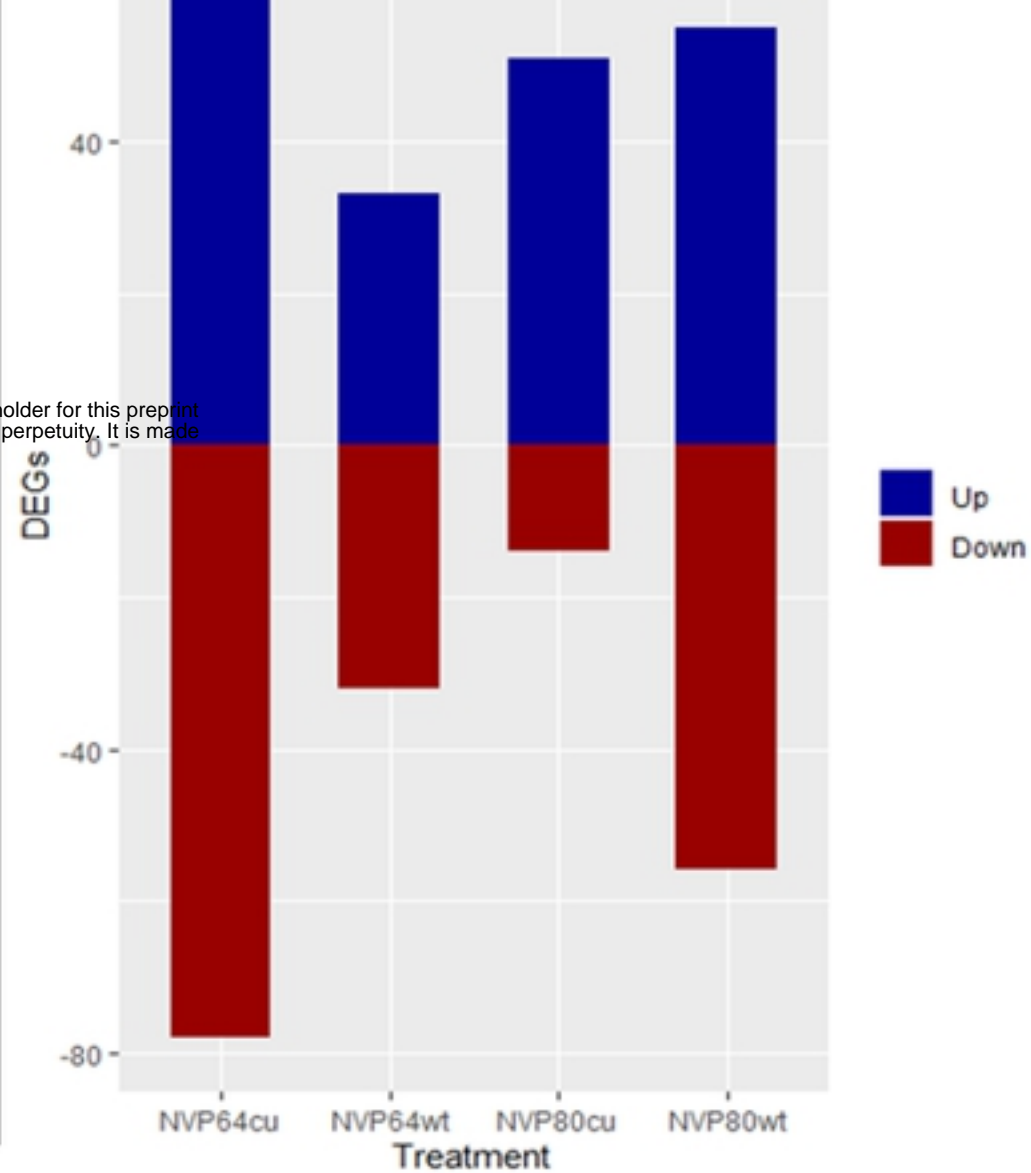

c)

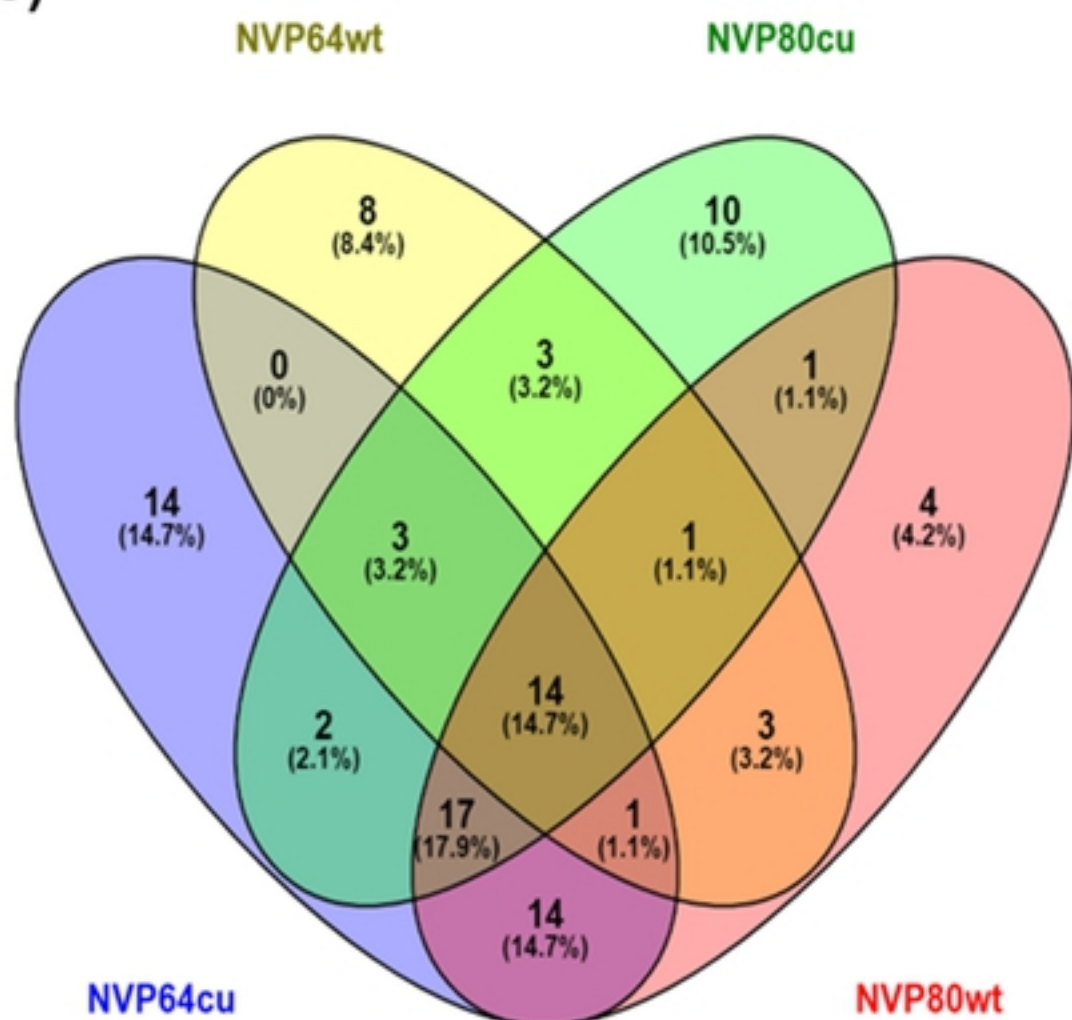

d)

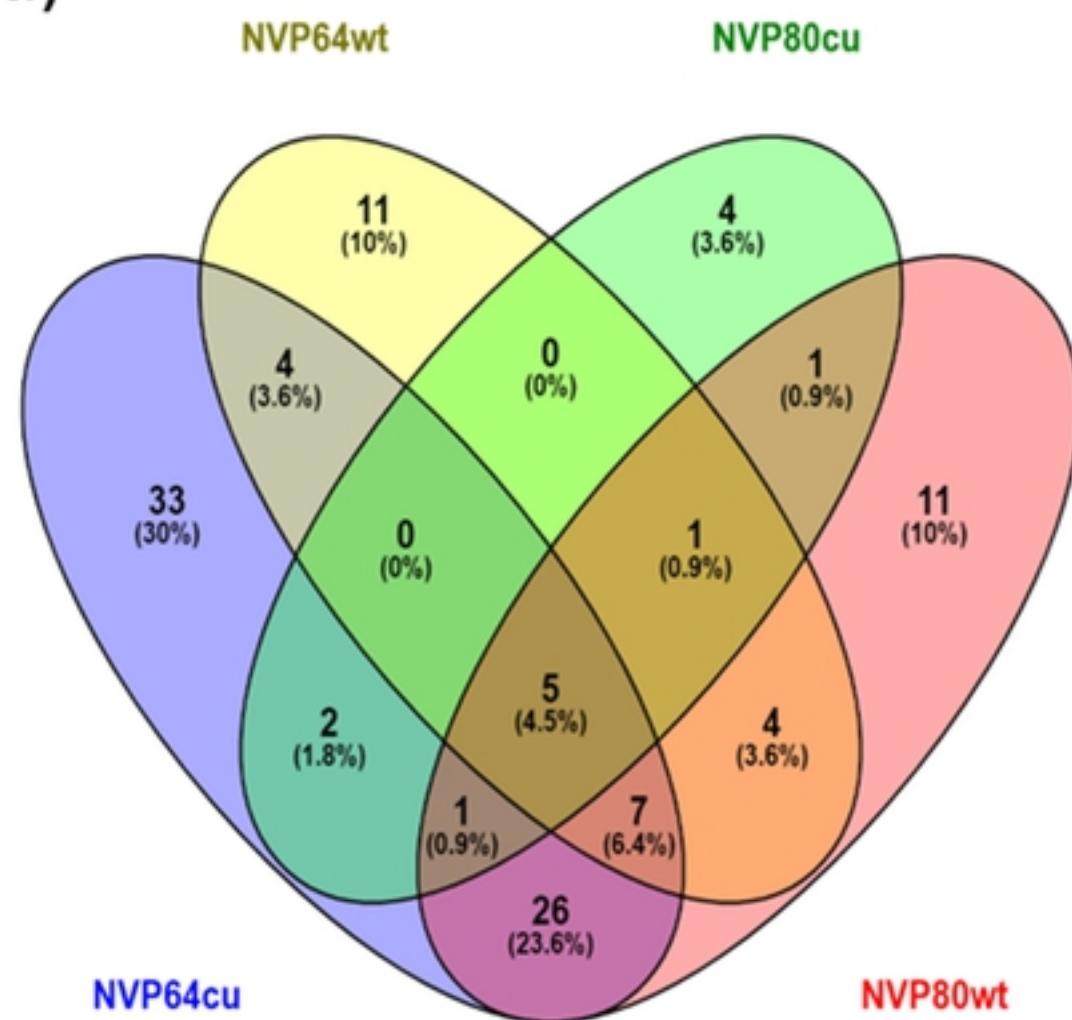

Figure 6
